1           **ZNF410 uniquely activates the NuRD component CHD4 to silence fetal**  
2                           **hemoglobin expression**

3 Xianjiang Lan<sup>1</sup>, Ren Ren<sup>2</sup>, Ruopeng Feng<sup>3</sup>, Lana C. Ly<sup>4</sup>, Yemin Lan<sup>5</sup>, Zhe Zhang<sup>6</sup>,  
4 Nicholas Aboreden<sup>5</sup>, Kunhua Qin<sup>1</sup>, John R. Horton<sup>2</sup>, Jeremy D. Grevet<sup>7</sup>, Thiyagaraj  
5 Mayuranathan<sup>3</sup>, Osheiza Abdulmalik<sup>1</sup>, Cheryl A. Keller<sup>8</sup>, Belinda Giardine<sup>8</sup>, Ross C.  
6 Hardison<sup>8</sup>, Merlin Crossley<sup>4</sup>, Mitchell J Weiss<sup>3</sup>, Xiaodong Cheng<sup>2</sup>, Junwei Shi<sup>9\*</sup>, Gerd A.  
7 Blobel<sup>1,5,10\*</sup>

8 **Affiliations:**

9 <sup>1</sup> Division of Hematology, The Children’s Hospital of Philadelphia, Philadelphia, PA 19104, USA

10 <sup>2</sup> Department of Epigenetics and Molecular Carcinogenesis, University of Texas MD Anderson  
11 Cancer Center, Houston, TX 77030, USA

12 <sup>3</sup> Department of Hematology, St. Jude Children's Research Hospital, Memphis, TN, 38105, USA

13 <sup>4</sup> School of Biotechnology and Biomolecular Sciences, University of New South Wales (UNSW)  
14 Sydney, Sydney, New South Wales, 2052, Australia

15 <sup>5</sup> Perelman School of Medicine, University of Pennsylvania, Philadelphia, PA 19104, USA

16 <sup>6</sup> Department of Biomedical and Health Informatics, The Children’s Hospital of Philadelphia,  
17 Philadelphia, PA 19104, USA

18 <sup>7</sup> Department of Medicine, Massachusetts General Hospital, Boston, MA, 02114, USA

19 <sup>8</sup> Department of Biochemistry and Molecular Biology, Pennsylvania State University, University  
20 Park, PA 16802, USA

21 <sup>9</sup> Department of Cancer Biology, Perelman School of Medicine, University of Pennsylvania,  
22 Philadelphia, PA 19104, USA

23 <sup>10</sup>Lead Contact

24 \*Correspondence: [BLOBEL@email.chop.edu](mailto:BLOBEL@email.chop.edu); [jushi@upenn.edu](mailto:jushi@upenn.edu)

25 **Summary**

26

27 Metazoan transcription factors typically regulate large numbers of genes. Here we identify  
28 via a CRISPR-Cas9 genetic screen ZNF410, a pentadactyl DNA binding protein that in  
29 human erythroid cells directly and measurably activates only one gene, the NuRD  
30 component CHD4. Specificity is conveyed by two highly evolutionarily conserved clusters  
31 of ZNF410 binding sites near the CHD4 gene with no counterparts elsewhere in the  
32 genome. Loss of ZNF410 in adult-type human erythroid cell culture systems and  
33 xenotransplant settings diminishes CHD4 levels and derepresses the fetal hemoglobin  
34 genes. While previously known to be silenced by CHD4, the fetal globin genes are  
35 exposed here as among the most sensitive to reduced CHD4 levels. In vitro DNA binding  
36 assays and crystallographic studies reveal the ZNF410-DNA binding mode. ZNF410 is a  
37 remarkably selective transcriptional activator in erythroid cells whose perturbation might  
38 offer new therapeutic opportunities in the treatment of hemoglobinopathies.

39

40

41

42

43

44

45

46

47

48 **Highlights**

49

- 50 • A CRISPR screen implicates ZNF410 in fetal globin gene repression

51

- 52 • The CHD4 gene is the singular direct ZNF410 target in erythroid cells

53

- 54 • The fetal globin genes are exquisitely sensitive to CHD4 levels

55

- 56 • Five C2H2 zinc fingers of ZNF410 recognize the major groove of a 14 base pair  
57 sequence

58

59 **Keywords**

60

61 CHD4; NuRD; ZNF410; transcription factor; transcription; fetal hemoglobin; CRISPR  
62 screen, sickle cell disease; hemoglobin switching; erythroid biology

63

64

65

66

67

68

69

70

71 **Introduction**

72

73 In bacteria, one regulatory transcription factor (TF) often controls the expression of a  
74 single gene or operon (Jacob et al., 1960). In contrast, the vast majority of mammalian  
75 TFs regulate many target genes. Spatio-temporal specificity of gene transcription is  
76 achieved by combinatorial deployment of TFs and their co-regulators. For example, the  
77 transcription factor GATA1 cooperates with the TF KLF1 and TAL1/SCL to regulate  
78 erythroid-specific gene expression (Love et al., 2014), whereas GATA1 and ETS family  
79 TFs regulate megakaryocyte-enriched genes (Wang et al., 2002). In erythroid cells, the  
80 most highly expressed genes encode the  $\alpha$ - and  $\beta$ -subunits of the hemoglobin tetramer.  
81 The human  $\beta$ -type globin gene cluster consists of one embryonic gene (HBE, also known  
82 as  $\epsilon$ -globin), two fetal genes (HBG1 and HBG2, also known as  $^G\gamma$ -globin and  $^A\gamma$ -globin),  
83 and two adult genes (HBB and HBD, also known as  $\beta$ -globin and  $\delta$ -globin) genes. The  $\epsilon$ -  
84 globin gene is transcribed in primitive erythroid cells in early development, and during  
85 mid-gestation, is silenced concomitantly with the  $\gamma$ -globin genes turning on. Around the  
86 time of birth a second switch occurs when  $\beta$ - and  $\delta$ -globin transcription is activated at the  
87 expense of the  $\gamma$ -globin genes. Therefore, disease causing alterations in the  $\beta$ -globin  
88 gene such as those causing sickle cell disease (SCD) and some types of  $\beta$ -thalassemia  
89 become symptomatic after birth, coincident with the  $\gamma$ -to- $\beta$ -globin switch. Reversing the  
90 switch from  $\beta$ -globin back to  $\gamma$ -globin expression in developing erythroid cells has been a  
91 major endeavor for treating these diseases (Platt et al., 1994; Wienert et al., 2018).

92

93 While lineage restricted TFs such as GATA1 and TAL1 are essential for erythroid specific  
94 transcription, two zinc-finger TFs, BCL11A and LRF (ZBTB7A), play a dominant role in  
95 the developmental control of the fetal to adult switch in globin gene transcription (Masuda  
96 et al., 2016; Menzel et al., 2007; Sankaran et al., 2008; Uda et al., 2008). Both of these  
97 factors bind at several locations along the  $\beta$ -globin gene cluster, including the promoter  
98 and upstream regions of the  $\gamma$ -globin genes to silence their expression (Liu et al., 2018;  
99 Martyn et al., 2018). Both factors interact with the CHD4/NuRD complex, and CHD4 and  
100 associated proteins are required for transcriptional repression of the  $\gamma$ -globin genes  
101 (HBG1/2) (Amaya et al., 2013; Masuda et al., 2016; Xu et al., 2013). Given that BCL11A  
102 contains a motif found in a variety of NuRD associated molecules that is necessary and  
103 sufficient for NuRD binding (Hong et al., 2005; Lejon et al., 2011), the most parsimonious  
104 model is that BCL11A and LRF are direct links between NuRD and the  $\gamma$ -globin genes.  
105 One key unanswered question that is whether the expression of NuRD proteins  
106 themselves is regulated, and whether control of NuRD expression might be part of the  $\gamma$ -  
107 globin regulatory circuitry.

108

109 To search for novel regulators of  $\gamma$ -globin expression, we screened a sgRNA library  
110 targeting the DNA-binding domains of most known human transcription factors using an  
111 optimized protein domain-focused CRISPR-Cas9 screening platform (Grevet et al., 2018;  
112 Shi et al., 2015). We found that zinc finger 410 (*ZNF410*, APA-1), a transcription factor  
113 with five tandem canonical C2H2-type zinc fingers (ZFs) is required for the maintenance  
114 of  $\gamma$ -globin silencing. RNA-seq, ChIP-seq and genetic perturbation led to the remarkable  
115 finding that ZNF410 regulates CHD4 as its sole direct target gene via two binding site

116 clusters not found elsewhere in the genome. We further demonstrate that the  $\gamma$ -globin  
117 genes are exquisitely sensitive to CHD4 levels. DNA binding and crystallographic studies  
118 reveal the mode of ZNF410 interaction with DNA. To our knowledge, ZNF410 is the only  
119 known mammalian TF with a single regulatory target in erythroid cells.

120

121

## 122 **Results**

123

### 124 **CRISPR-Cas9 screen identifies ZNF410 as a candidate $\gamma$ -globin repressor**

125

126 To identify novel regulators of HbF expression, we screened a sgRNA library containing  
127 6 sgRNAs each targeting the DNA-binding domain of most human transcription factors  
128 (1436 total, on average 6 sgRNAs each) (Huang et al., 2020). A lentiviral vector library  
129 encoding the sgRNAs was used to transfect the human adult-type erythroid cell line  
130 HUDEP-2 that stably expresses spCas9 (HUDEP-2-Cas9; (Grevet et al., 2018)). The top  
131 10% and bottom 10% of HbF expressing cells were purified via anti-HbF FACS, and  
132 representation of each sgRNA in the two populations assessed by deep sequencing  
133 (Figure 1A). As expected, control non-targeting sgRNAs were evenly distributed between  
134 the HbF-high and HbF-low populations. Positive control sgRNAs targeting the known  $\gamma$ -  
135 globin repressor genes BCL11A and LRF were enriched in the HbF-high population  
136 (Figure 1B), validating the screen. Six sgRNAs against a novel TF, ZNF410, with no  
137 known prior role in globin gene regulation were significantly enriched in the HbF-high

138 population (Figure 1B), suggesting that ZNF410 may function as a direct or indirect  
139 repressor of  $\gamma$ -globin expression.

140

141 Little is known about *ZNF410*. One report suggests that it functions as a transcriptional  
142 activator in human fibroblasts (Benanti et al., 2002). ZNF410 is widely expressed across  
143 human tissues (Genotype-Tissue Expression database). In blood, ZNF410 is highly  
144 expressed in the erythroid lineage (BloodSpot), and its mRNA levels are similar between  
145 fetal and adult erythroblasts (Huang et al., 2017).

146

147 To validate the screening results, two independent sgRNAs targeting the DNA-binding  
148 domain of ZNF410 were stably introduced into HUDEP-2-Cas9 cells along with a positive  
149 control sgRNA (targeting the +58 erythroid enhancer of the *BCL11A* gene) and non-  
150 targeting negative control sgRNA. Depletion of ZNF410 strongly increased the fraction of  
151 HbF-expressing cells as determined by flow cytometry using anti-HbF antibodies (Figures  
152 1C and S1A). Western blotting revealed substantial elevation of  $\gamma$ -globin protein in  
153 ZNF410 depleted HUDEP-2 cells. Protein levels of GATA1 were unchanged, consistent  
154 with erythroid maturation being intact in these cells (Figure 1D). To assess whether  
155 ZNF410 impacts the transcription of the  $\gamma$ -globin gene, we carried out RT-qPCR. A robust  
156 increase in primary and mature  $\gamma$ -globin mRNA occurred upon ZNF410 depletion,  
157 suggesting transcriptional regulation (Figures 1E and S1B-S1C). ZNF410 loss did not  
158 impact  $\epsilon$ -globin mRNA levels, suggesting specificity for the fetal globin genes (Figure  
159 S1D). Importantly, there were no notable changes in  $\alpha$ -globin,  $\beta$ -globin, and GATA1  
160 mRNA levels (Figures S1E-S1G), suggesting that ZNF410 depletion did not overtly impair

161 erythroid differentiation, an observation further supported by RNA-seq analysis (below,  
162 Figure S1H). Taken together, our screen identified ZNF410 as novel repressor of  $\gamma$ -globin  
163 gene expression in HUDEP-2 cells.

164

### 165 **Depletion of ZNF410 elevates $\gamma$ -globin levels in primary human erythroblasts**

166

167 The repressive role of ZNF410 on HbF was further tested in primary human erythroblasts  
168 derived from a three-phase human CD34<sup>+</sup> hematopoietic stem and progenitor cells  
169 (HSPCs) culture system (Grevet et al., 2018). We depleted ZNF410 by electroporating  
170 ribonucleoprotein (RNP) Cas9:sgRNAs complexes using two independent sgRNAs. A  
171 sgRNA targeting the erythroid +58 enhancer of BCL11A was used as positive control. In  
172 line with findings in HUDEP-2 cells, ZNF410 depletion significantly elevated the  
173 proportion of HbF<sup>+</sup> cells (Figures 2A and 2B),  $\gamma$ -globin protein levels (Western blot, Figure  
174 2C), HbF protein levels (HPLC, Figure 2D), and  $\gamma$ -globin primary and mature mRNA  
175 (Figures 2E and S2A-S2B). Moreover,  $\epsilon$ -globin mRNA levels were unaffected (Figure  
176 S2C);  $\alpha$ -globin,  $\beta$ -globin, and GATA1 levels remained largely unchanged (Figures S2D-  
177 S2F), suggesting that ZNF410 loss did not adversely affect maturation of these cells. Cell  
178 surface marker phenotyping using anti-CD71 and anti-CD235a antibodies as well as  
179 examination of cell morphology (Figures S2G and S2H) indicated normal erythroid  
180 maturation in ZNF410 deficient cells.

181

182 In vitro cell culture systems may not always reflect the true biology of developing erythroid  
183 cells in vivo. Moreover, commonly used mouse models may in some cases not faithfully



184 reproduce all regulatory features of human erythroid cells (Huang et al., 2020). Therefore,  
185 we used a human-to-mouse xenotransplantation model to further assess the role of  
186 ZNF410 on the regulation of  $\gamma$ -globin in vivo. We transfected normal adult human donor  
187 CD34+ HSPCs with ribonucleoprotein complex consisting of spCas9 + two sgRNAs  
188 (analyzed separately) or a non-targeting sgRNA as negative control, and then  
189 transplanted them into NBSGW immunodeficient mice that support human erythropoiesis  
190 in the bone marrow (McIntosh et al., 2015). We measured the fraction of various engrafted  
191 human lineages and their gene editing frequencies in recipient bone marrow at 16 weeks  
192 after xenotransplantation (Figure 2F), a time at which CD34+ progenitor cells are mainly  
193 derived from the human transplant (McIntosh et al., 2015). Donor chimerism of ZNF410  
194 edited CD45+ hematopoietic cells was slightly lower than in control cells exposed to non-  
195 targeting sgRNA (Figure S2I). Chimerism levels and indel frequencies were similar in all  
196 edited and nonedited lineages tested, including B-cells, myeloid, erythroid and progenitor  
197 cells (Figures S2J and S2K), indicating that ZNF410 depletion did not overtly impact  
198 hematopoietic development. Importantly, in the erythroid compartment (CD235+), we  
199 observed a robust increase in the fraction of HbF+ cells (from ~23% to ~78%), HbF  
200 protein levels (from ~3% to ~33%), and  $\gamma$ -globin mRNA levels (from ~3% to ~32%)  
201 (Figures 2G-2I), consistent with the results in HUDEP-2 and cultured primary human  
202 erythroblasts. Again, depletion of ZNF410 did not appear to impair erythroid maturation  
203 (Figure S2L). Collectively, these in vivo studies verify that ZNF410 functions as a robust  
204 repressor of HbF with little effect on hematopoietic development.

205

206 **ZNF410 represses HbF by modulating CHD4 expression**

207 ZNF410 was previously reported to function as a transcriptional activator (Benanti et al.,  
208 2002). To understand how ZNF410 regulates the transcription of  $\gamma$ -globin genes, we  
209 performed RNA-seq experiments in ZNF410 depleted differentiated HUDEP-2 cells and  
210 primary human erythroblasts. Upon ZNF410 depletion in HUDEP2 cells, 70 genes were  
211 up- and 46 genes were down-regulated, respectively, with a threshold setting of 1.5-fold  
212 ( $p$ -value $<0.05$ ), and only counting genes that incurred changes with both ZNF410  
213 sgRNAs in each of the biological replicates (Figure S3A). In primary erythroid cultures,  
214 83 genes were up-regulated and 126 genes were down-regulated, respectively upon  
215 ZNF410 depletion (Figure S3A). This includes 30 up-regulated and 15 down-regulated  
216 genes in both cell types (Figures S3B). Notably,  $\gamma$ -globin (HBG) mRNA levels stood out  
217 among the most strongly induced genes (Figures 3A-3B and S3C-S3D, Table S8).

218

219 The CHD4 gene which encodes the catalytic subunit of the NuRD complex, was among  
220 the most downregulated genes (Figures 3A-3B and S3C-S3D, Table S8). The NuRD  
221 complex contributes to the  $\gamma$ -globin repressive functions of BCL11A and LRF in erythroid  
222 cells. In addition to CHD4, the GATAD2A, HDAC2, MBD2 and MTA2 subunits of the  
223 NuRD complex are required for  $\gamma$ -globin repression (Sher et al., 2019). However, the  
224 mRNA levels of these subunits were not diminished in ZNF410 depleted cells, suggesting  
225 that CHD4 is the only ZNF410-regulated NuRD subunit (Figures 3A-3B and S3C-S3D).  
226 We validated these results by RT-qPCR in HUDEP-2 cells, cultured primary erythroid  
227 cells, and ZNF410-depleted erythroid cells isolated from xenotransplanted NBSGW mice  
228 (Figures S3E-S3G). Overall, the reduction in CHD4 transcript levels amounted to  
229 approximately 65% in HUDEP-2, primary cultures and xenotransplanted mice (Figures

230 S3E-S3G). That ZNF410 might be limiting for CHD4 transcription is further supported by  
231 the strong correlation between ZNF410 and CHD4 transcript levels across 53 human  
232 tissues based on the Genotype-Tissue Expression database (Figure S3H).

233

234 In agreement with the mRNA analysis, CHD4 protein levels were significantly reduced  
235 upon ZNF410 depletion in HUDEP2 and primary erythroblasts, while BCL11A, LRF,  
236 HDAC2 and MBD2 protein amounts remained unchanged (Figures 3C and 3D). Of note,  
237 although GATAD2A and MTA2 transcripts were unaltered, their proteins levels were  
238 reduced upon ZNF410 depletion (Figures 3C-3D and S3E-S3G). We speculate that these  
239 subunits are destabilized in the absence of CHD4 (Torrado et al., 2017). No other genes  
240 known to regulate  $\gamma$ -globin silencing were altered by ZNF410 depletion, suggesting that  
241 CHD4 is the critical link between ZNF410 and  $\gamma$ -globin silencing.

242

### 243 **CHD4 is the sole mediator of ZNF410 function**

244

245 Our results so far implicate CHD4 as the key ZNF410-controlled regulator of  $\gamma$ -globin  
246 silencing. Therefore, we examined whether expression of CHD4 in ZNF410 depleted cells  
247 restored  $\gamma$ -globin silencing. We transduced ZNF410-deficient HUDEP-2 cells with a  
248 lentiviral vector encoding *CHD4* cDNA linked to an IRES element and GFP expression  
249 cassette, followed by FACS purification of GFP<sup>+</sup> cells. The transduced cells expressed  
250 *CHD4* mRNA at a level approximately 2.0-fold above normal (Figure 3E). CHD4  
251 expression almost completely restored the silencing of  $\gamma$ -globin without influencing the  
252 expression of other erythroid genes such as  $\alpha$ -globin,  $\beta$ -globin, and GATA1 (Figures 3F

253 and S4A-S4E). To assess whether other transcriptional changes resulting from ZNF410  
254 loss are also attributable to lower CHD4 levels, we performed replicate RNA-seq  
255 experiments in the CHD4-expressing ZNF410-deficient HUDEP-2 cells. Notably, 69 out  
256 of 70 upregulated genes and 44 out of 46 downregulated genes in the ZNF410 deficient  
257 cells were expressed at normal levels following CHD4 “rescue” (Figures 3G-3H and S4F-  
258 S4G). Why the expression of three genes was incompletely restored upon *CHD4* re-  
259 expression is unclear but might be due to imperfect levels of CHD4 restoration or a drift  
260 in gene expression profiles following gene knockout/rescue experiments in cell pools.  
261 None of the three genes whose expression remained unrestored to normal levels are  
262 associated with ZNF410 ChIP-seq peaks (see below), suggesting that they are not direct  
263 ZNF410 targets. Together, these results suggest that CHD4 is the only functionally  
264 relevant ZNF410 target gene, and is responsible for the repression of  $\gamma$ -globin  
265 transcription. Another remarkable finding is that the  $\gamma$ -globin genes (HBG1/2) are among  
266 the most sensitive to CHD4 levels.

267

### 268 **A singular enrichment of ZNF410 binding clusters at the CHD4 gene**

269

270 Our RNA-seq study identified numerous genes that were up- or down-regulated after  
271 ZNF410 depletion. To investigate which of these genes are direct ZNF410 targets, we  
272 performed anti-ZNF410 ChIP-seq in HUDEP-2 and primary human erythroblasts with  
273 ZNF410-deficient HUDEP-2 cells as a control. We detected only 8 high-confidence peaks  
274 corresponding to 7 genes total in both HUDEP-2 and primary human erythroid cells  
275 (Figure 4A). To exclude the possibility that such unusually few called peaks are due to

276 limitations in ZNF410 detection by ChIP, we overexpressed HA-tagged ZNF410 or empty  
277 vector in HUDEP-2 cells (Figure S5A). Anti-HA ChIP-seq detected the same 8 ZNF410  
278 peaks with comparable intensity profiles (Figure 4A). No ZNF410 binding was detected  
279 at the  $\beta$ -globin locus (Figure S5B), supporting a model in which ZNF410 regulates  $\gamma$ -globin  
280 transcription indirectly. 6 of 8 ZNF410 ChIP-seq peaks were of modest magnitude. Most  
281 strikingly, two very strong peaks were located at the promoter and enhancer of the CHD4  
282 gene. These data suggest that ZNF410 directly regulates an unusually small number of  
283 genes and that suppression of ZNF410 may induce  $\gamma$ -globin transcription by  
284 downregulating the NuRD component CHD4.

285  
286 HOMER motif analysis based on the 8 high-confidence binding sites from our ChIP-seq  
287 data generated the 12-nucleotide motif CATCCATAATA (Figure 4C), which is almost  
288 identical to that found by in vitro SELEX experiments of human ZNF410 (Jolma et al.,  
289 2013). Utilizing EMBOSS fuzznuc we found 434 of such motif instances, and 3677  
290 instances when combining all the motifs found under ZNF410 ChIP-seq peaks. Overall  
291 frequency of these motifs is very low compared to those of most transcription factor  
292 binding sites (Srivastava and Mahony, 2020). However, since the vast majority of these  
293 motifs had no measurable ChIP-seq signal, additional features must account for the rare  
294 in vivo binding events. The two strongest ZNF410 ChIP-seq peaks at the CHD4 promoter  
295 and enhancer encompass 15 and 11 motifs, respectively (each within a 1.5 kb window),  
296 while the remaining 6 modest peaks harbor only one motif (Figures 4A and 4C).  
297 Importantly, the 2 peaks at the CHD4 locus are the only regions in the entire genome with  
298 a high density of ZNF410 motifs, likely explaining the exquisite target specificity.

299 To explore additional criteria that might account for the selectivity of ZNF410 binding to  
300 chromatin, we asked whether ZNF410 chromatin occupancy is associated with features  
301 of open chromatin. First, we generated in primary human erythroblasts ChIP-seq profiles  
302 for H3K27ac, a histone mark associated with active regulatory elements, and  
303 complemented these data by mining chromatin accessibility (ATAC-seq) data from  
304 primary human erythroblasts (Ludwig et al., 2019). All 8 ZNF410 peaks, including the two  
305 strong peaks at the CHD4 promoter and enhancer, fell into accessible chromatin that was  
306 flanked by regions enriched in H3K27ac (Figures 4A and S5C). In contrast, the vast  
307 majority of the unbound consensus motif instances elsewhere in the genome were in  
308 regions devoid of H3K27ac or ATAC-seq signal (Table S9). Although the scarcity of  
309 ZNF410-bound sites precludes an extensive correlative analysis, we did find only a very  
310 modest positive correlation between strengths of signal for ZNF410 binding with H3K27ac  
311 levels or ATAC-seq signal (Pearson's correlation coefficient of 0.33 and 0.24, respectively  
312 in primary erythroblasts; Figure S5C). However, the categorical association of ZNF410  
313 binding with open, active chromatin was almost complete, suggesting that ZNF410  
314 requires open chromatin and perhaps additional transcription factor binding sites, in  
315 addition to motif clustering, to enable its binding to chromatin.

316

317 The mere occupancy of a transcription factor at a gene does not necessarily lead to  
318 regulatory influence. We examined and validated our RNA-seq data in ZNF410-deficient  
319 cells for the expression of the seven genes bound by ZNF410. Importantly, among these  
320 genes, *CHD4* was the only one with significantly reduced mRNA levels in ZNF410  
321 depleted cells (Figures 4D-4E and S5D-S5E). Thus, ZNF410 directly and functionally

322 regulates a single target gene, CHD4, in erythroid cells. Hence, the vast majority of gene  
323 expression changes that occur upon ZNF410 loss are likely due to diminished CHD4  
324 levels. This model is supported by the restoration of transcriptome changes upon CHD4  
325 expression in ZNF410 deficient cells (Figures 3G-3H and S4F-S4G).

326

### 327 **ZNF410 binding to chromatin occurs at highly conserved motif clusters**

328

329 Highly conserved non-coding elements can function as enhancers and are associated  
330 with transcription factor binding sites (Pennacchio et al., 2006). We assessed  
331 conservation of the ZNF410 binding regions at the CHD4 locus using the phastCons  
332 scores deduced from sequence similarities across 100 vertebrate species (Siepel et al.,  
333 2005). Both ZNF410 binding site clusters displayed a high degree of conservation,  
334 comparable to those at the *CHD4* exons (Figure S5F). Moreover, the human ZNF410  
335 protein sequence is 94% identical to mouse protein, and the DNA binding ZF domain is  
336 nearly 100% identical (Figure S5G).

337

338 To examine whether ZNF410 binding selectivity for the CHD4 locus is conserved in  
339 mouse, we carried out ZNF410 ChIP-seq in the erythroid cell line G1E-ER4 (Weiss et al.,  
340 1997). As in human cells, the *Chd4* promoter and enhancer were by far the most strongly  
341 occupied regions genome wide (Figure 4B). Of the 6 human genes that exhibited modest  
342 ZNF410 ChIP-seq signals, no signal was detected at 4 orthologues in mice (*Lin54*,  
343 *Timeless*, *Icam2*, and *Cbx8*). A modest signal was detected at the mouse *Supt16* gene  
344 but its expression was not altered by loss of ZNF410. Further analysis confirmed that

345 among 1876 motif instances matching the most common motifs in the human genome,  
346 the *Chd4* promoter and enhancer are also by far the most enriched locations in mouse  
347 genome (Figure 4B). Taken together, these findings indicate that regulation of the *CHD4*  
348 gene by ZNF410 is mediated through unique, evolutionarily conserved motif clusters.

349

### 350 **Characterization of DNA binding by ZNF410**

351

352 ZNF410 contains five tandem C2H2-type zinc fingers (ZFs) potentially involved in DNA  
353 binding (Figure 5A). However, as is the case for many ZF transcription factors, not all ZFs  
354 necessarily make direct DNA contacts. We assessed direct DNA binding by full length  
355 (FL) ZNF410 to sequences found at the *CHD4* gene by electrophoretic mobility shift  
356 assays (EMSAs). Using nuclear extracts from COS cells overexpressing FLAG-tagged  
357 ZNF410 constructs and radiolabeled probes containing the relevant motifs (Figure 5B),  
358 FL ZNF410 protein displayed comparable binding to each of the four DNA probes  
359 containing a single motif associated with ChIP-seq signal at the *CHD4* promoter and  
360 enhancer (Figure 5C). Addition of anti-FLAG antibody to the binding reaction led to a  
361 “supershift” (Figure 5C), confirming binding specificity.

362

363 The domain spanning all five ZFs was sufficient for DNA binding, and like FL ZNF410,  
364 displayed similar binding intensity across the four probes (Figure S6A). Again, addition of  
365 anti-FLAG antibody caused a “supershift”, validating the specific interactions between the  
366 ZF domain and the probes (Figure S6A). The stronger signal generated by the ZF domain  
367 compared to that of full length ZNF410 (Figure 5D) is likely due to the higher expression



368 level of the former (Figure S6B). To assess the contribution to DNA binding by each of  
369 the five ZFs, we generated versions containing various ZF combinations (Figure S6B). In  
370 EMSA, the central 3 ZFs (2-4) were insufficient for DNA binding, however, if either ZF1  
371 or ZF5 was present (ZF1-4 and ZF2-5, respectively), DNA binding was enabled (Figure  
372 5D). Additionally, we observed DNA binding activity, albeit reduced, by ZF1-3 and ZF3-5  
373 (Figure 5D). Thus, the central 3 ZFs (2-4) are insufficient for DNA binding, with a ZF at  
374 either end (ZF1 or ZF5) contributing to DNA contacts in this assay. Together, these data  
375 support the view that each of the five ZFs of ZNF410 is involved in DNA binding.

376  
377 According to the EMSAs, the ZF1-5 domain displays strong DNA binding in vitro, while  
378 ZF2-4 does not (Figure 5D). We reasoned that overexpression of ZF1-5 but not ZF2-4  
379 should compete with endogenous ZNF410 for chromatin binding, thus acting in a  
380 dominant-negative manner. To test this hypothesis, we introduced via lentiviral infection  
381 into HUDEP-2 cells a construct containing HA-tagged ZF1-5 or ZF2-4 driven by the EF1 $\alpha$   
382 promoter. As control, we also forced the expression of full-length HA-tagged ZNF410.  
383 Overexpression of ZF1-5 or ZF2-4 did not influence the endogenous ZNF410 expression  
384 (Figure S6C). ChIP-seq experiments demonstrated that overexpressed ZF1-5 (roughly  
385 20-fold compared to endogenous ZNF410 protein levels) bound to the CHD4 regulatory  
386 regions and to the other ZNF410 targets in a pattern very similar to endogenous ZNF410  
387 (Figures 5E and S6C-S6E). Moreover, full-length HA-ZNF410 when overexpressed to  
388 similar levels to HA-ZF1-5 (Figure S6C) also produced similar binding patterns (Figure  
389 4A). This suggests that the ZF domain is sufficient for ZNF410 chromatin occupancy, and  
390 that regions outside this domain contribute little if anything to chromatin binding. ZF2-4

391 displayed no chromatin occupancy at all sites examined, consistent with in vitro DNA  
392 binding properties, but with the caveat that it was expressed at lower levels (Figure 5E  
393 and S6C-S6E). Accordingly, ZF1-5 markedly interfered with endogenous ZNF410 binding  
394 while ZF2-4 was inert (Figure 5E and S6D-S6F). To assess the impact of interference  
395 with endogenous ZNF410 chromatin binding on CHD4 expression, we carried out RT-  
396 qPCR and found CHD4 mRNA levels to be reduced by approximately 70% compared to  
397 control (Figure 5F), which is comparable to ZNF410 knockout (Figure 3E). In contrast,  
398 overexpression of ZF2-4 did not influence CHD4 expression, however, overexpression of  
399 full length ZNF410 increased CHD4 expression (Figure 5F). Thus, the ZF region is  
400 sufficient for chromatin occupancy but insufficient for *CHD4* gene activation. In agreement  
401 with the results from ZNF410 depletion experiments, overexpression of ZF1-5 or ZF2-4  
402 did not impact expression of the other 6 ZNF410 bound genes (Figure 5F). Finally, we  
403 also measured the impact of ZNF410 expression on  $\gamma$ -globin levels. ZF1-5 expression  
404 triggered a significant increase in  $\gamma$ -globin mRNA levels (Figures 5G and S6G), again  
405 comparable to that observed in ZNF410 depleted cells, while ZNF410 FL expression led  
406 to a slight decrease in the already low  $\gamma$ -globin mRNA levels (Figure 5G and S6G). We  
407 did note a modest increase in  $\gamma$ -globin mRNA levels upon ZF2-4 expression, the reason  
408 for which is unknown. In sum, the ZF domain of ZNF410 is necessary and sufficient to  
409 bind to DNA in vitro and in vivo and does not seem to bear any transactivation function  
410 on its own.

#### 411 **Structural basis of ZNF410-DNA binding**

412 To further gain insight into the molecular basis of how the ZNF410 tandem ZF domain  
413 recognizes its targeting DNA sequence, we performed crystallization of the ZNF410-DNA

414 complex. We first quantified the binding affinity of the ZNF410 ZF domain (ZF1-5) with  
415 the consensus motif by fluorescence polarization using purified GST fusion protein (Patel  
416 et al., 2016a). The ZF domain displayed a dissociation constant ( $K_D$ ) of 22 nM for the  
417 oligo containing the consensus motif while there was no measurable binding to the  
418 negative control (that shares 7/17 bp with the consensus motif) under the same conditions  
419 (Figure 6A). Using the same samples, we confirmed that the binding affinity of the ZF  
420 domain with the consensus oligo was between 10 and 20 nM by EMSA (Figure S6H).  
421 Next, we determined the crystal structure of the ZF domain in complex with the same 17-  
422 bp oligo containing the consensus motif. The structure of the protein-DNA complex was  
423 solved by the single-wavelength anomalous diffraction (SAD) method (Hendrickson et al.,  
424 1990) at 2.75 Å resolution (Table S10). As in conventional C2H2 ZF proteins (Wolfe et  
425 al., 2000), each of five fingers of ZNF410 comprises two strands and a helix, with two  
426 histidine residues in the helix together with one cysteine in each strand coordinating a  
427 zinc ion, forming a characteristic tetrahedral C2-Zn-H2 structural unit that confers rigidity  
428 to the fingers. When bound to DNA, ZF1-5 occupies the DNA major groove, with their  $\alpha$ -  
429 helices toward DNA and the strands and the C2-Zn-H2 units facing outside (Figures 6B  
430 and C). Side chains from specific amino acids within the N-terminal portion of each helix  
431 and the preceding loop (i.e., the 7 residues prior to the first Zn-coordinating histidine;  
432 Figure 6D) make major groove contacts with primarily three adjacent DNA base pairs,  
433 which we term the “triplet element”. The DNA oligo used for crystallization contains the  
434 15-bp consensus sequence (numbered 1-15 from 5' to 3' of the top strand; colored  
435 magenta in Figure 6E) recognized by the five fingers, plus one additional base pair on  
436 each end of the DNA duplex. The protein sequence runs in the opposite direction of the

437 top strand, from carboxyl (COOH) to amino (NH<sub>2</sub>) termini, resulting in ZF5 recognizing  
438 the 5' triplet (bp position 1-3), and the ZF1 recognizing the 3' triplet (bp position 13-15)  
439 (Figure 6E).

440

441 Each zinc finger contributes to specific DNA interactions. The most dominant direct base-  
442 specific interactions observed are the Ade-Gln and Ade-Asn contacts via three fingers,  
443 e.g., Q350 of ZF5 interaction with A3 (Figure 6F), N295 of ZF3 interaction with A8 (Figure  
444 6I), and Q264 of ZF2 interaction with A12 (Figure 6J). In accordance with apposition of  
445 Gln/Asn with Ade as the most common mechanism for Ade recognition (Luscombe et al.,  
446 2001), the side chain carboxamide moiety of glutamine and asparagine donates a H-bond  
447 to the O7 and accepts a H-bond from the N6 atoms of adenines, respectively, a pattern  
448 specific to Ade. ZF4 contacts two C:G base pairs at positions 5 and 6. K328 of ZF4  
449 interacts with the O6 atom of G5 (Figure 6G), while E322 of ZF4 forms a H-bond with the  
450 N4 atom and a C-H...O type H-bond (Horowitz and Trievel, 2012) with the C5 atom of  
451 cytosine at position 6 (Figure 6H). In addition, S325 of ZF4 forms a van der Waals contact  
452 with cytosine at position 5 (Figure 6G). ZF1 uses two aromatic residues (Tyr238 and  
453 Trp232) for interaction with the methyl group of thymine at position 12 and 15, respectively  
454 (Figure 6J and 6K). Among the base specific interactions, the C:G base pair at position 5  
455 and the T:A base pair at position 12 have direct protein interactions with both bases  
456 (Figure 6G and 6J). For additional description of the non-specific contacts, see  
457 supplementary text. In sum, the base specific interactions protect 10 base pairs (positions  
458 A3 to T12 in Figure 6E), out of 12-base pair consensus sequence (Figure 4C).

459

460 In addition to the direct base interactions, the first four fingers (ZF1-4) interact with DNA  
461 backbone phosphate groups, while ZF5 is devoid of such contact (Figure 6E). Among the  
462 five ZFs, ZF5 has the least number of contacts with DNA, whereas ZF1 has only the van  
463 der Waals contacts with the bases, and two of them are outside of consensus (nucleotide  
464 positions 14 and 15 in Figure 6E). This observation might explain that DNA binding in  
465 vitro was still enabled if either outside finger (ZF1 or ZF5), but not both, are removed  
466 (Figure 5D). Our structure also revealed that the fingers in the middle (ZF2-4) follow the  
467 one-finger-three base rule, each involving highly base specific interactions, whereas the  
468 fingers in the ends vary from 2-base (ZF5) to 4-base contacts (ZF1).

469

470

471

## 472 **Discussion**

473

474 By leveraging an improved CRISPR-Cas9 screening platform, we identified ZNF410, a  
475 pentadactyl zinc finger protein, as a novel regulator of fetal hemoglobin expression.  
476 ZNF410 regulates  $\gamma$ -globin expression through selective activation of CHD4 transcription.  
477 CHD4 appears to be the only direct functional target of ZNF410 in erythroid cells. Two  
478 highly conserved clusters of ZNF410 binding sites at the CHD4 promoter proximal region  
479 and enhancer that appear to be unique in the human and mouse genomes account for  
480 selective accumulation of ZNF410 at the CHD4 locus. In the absence of ZNF410, CHD4  
481 transcription is reduced but not entirely lost which explains the modest impact on global  
482 gene expression, and exposes the  $\gamma$ -globin genes as particularly sensitive to CHD4 levels.

483 In vitro DNA binding assays and crystallography reveal the DNA binding modalities. This  
484 study thus illuminates a highly selective transcriptional pathway from ZNF410 to CHD4 to  
485 the  $\gamma$ -globin genes in erythroid cells.

486

487 Most transcription factors bind to thousands of genomic sites, of which a significant  
488 fraction trigger changes in target gene transcription. ZNF410, however, directly activates  
489 just one gene in human erythroid cells. This is supported by the following observations:

490 1) ZNF410 chromatin binding as measured by ChIP-seq is only seen at a total of eight  
491 regions, with by far the strongest signals occurring in the form of two peak clusters near  
492 the CHD4 gene. Failure to detect more ChIP-seq peaks was not a consequence of  
493 overlooking potentially bound regions because of mappability issues, such as those  
494 presented by repetitive elements, since inclusion of reads that map to multiple locations  
495 did not reveal additional binding sites. 2) Clusters of ZNF410 motifs such as those at the  
496 CHD4 locus are not found elsewhere in the genome. 3) At the non-CHD4 ZNF410-bound  
497 sites, signals were not only much weaker, but showed little or no signal in murine cells.  
498 Hence, ZNF410 chromatin occupancy is conserved only at the CHD4 locus. 4) Among  
499 the few ZNF410 bound genes, CHD4 was the only one whose expression was reduced  
500 upon ZNF410 loss or upon expression of dominant interfering ZNF410 constructs. 5)  
501 Forced expression of CHD4 almost completely restored  $\gamma$ -globin silencing and  
502 transcriptome in ZNF410 deficient cells. This also suggests that indirect, motif-  
503 independent binding to chromatin, which might escape detection by ChIP, would not have  
504 significant regulatory influence.

505

506 When interrogating data sets from 53 tissues, the ZNF410 and CHD4 mRNA levels are  
507 highly correlated, suggesting that ZNF410 may be generally limiting for CHD4 expression  
508 across tissues and cell lines. Notably, in luminal breast cancer cell lines, ZNF410 and  
509 CHD4 are the top co-essential genes, implying that they function in the same pathway  
510 (Depmap; <https://depmap.org>). Loss of ZNF410 does not completely abrogate CHD4  
511 gene transcription. Consequently, the requirement of ZNF410 for CHD4 transcription is  
512 not absolute, implicating involvement of other factors in the regulation of the CHD4 gene.  
513 Whether ZNF410 has additional target genes in other tissues remains to be determined.

514

515 We are unaware of other transcriptional activators with single target genes, but there are  
516 cases of transcription factors with only very few target genes. For example, ZFP64 is an  
517 11-zinc finger protein which binds most strongly to clusters of elements near the MLL  
518 gene, reminiscent of the ZNF410 motif clusters at the CHD4 locus (Lu et al., 2018). Yet  
519 ZFP64 displays thousands of additional high confidence ChIP-seq peaks even though it  
520 regulates only a small fraction of associated genes. The KRAB-ZFP protein Zfp568 is a  
521 transcriptional repressor that seems to only silence the expression of the Igf2 gene in  
522 embryonic and trophoblast stem cells, even though it occupies dozens of additional sites  
523 in the genome (Yang et al., 2017). Remarkably, deletion of the Igf2 gene in mice rescues  
524 the detrimental effects on gastrulation incurred upon Zfp568 loss, but embryonic lethality  
525 persists, implying the presence of additional Zfp568 repressed genes. Extraordinarily high  
526 gene selectivity has also been reported for transcriptional co-factors. For example,  
527 TRIM33, a cofactor for the myeloid transcription factor PU.1, has been shown to occupy  
528 only 31 genomic sites in murine B cell leukemia, and appears to preferentially associate

529 with enhancers containing a high density of PU.1 binding sites (Wang et al., 2015).  
530 Transcription factors are normally employed at numerous genes, and spatio-temporal  
531 specificity is accomplished through combinatorial action with other transcription factors.  
532 However, the number of target genes for transcription factors and co-factors varies by  
533 three orders of magnitude (ENCODE Transcription Factor Targets). ZNF410 seems to  
534 have evolved to require motif clusters such as those found at the CHD4 locus to achieve  
535 such high levels of target gene specificity.

536

537 What accounts for the high selectivity of ZNF410 chromatin occupancy? 1) The human  
538 genome contains 434 perfect ZNF410 motif instances and 3677 similar ones if adding up  
539 all the motifs that are found under ZNF410 peaks, which is a much smaller number than  
540 that for the great majority of transcription factors (Srivastava and Mahony, 2020). Thus,  
541 motif scarcity is likely one determinant of target selectivity but obviously insufficient as the  
542 sole explanation. 2) ZNF410 binding site clusters are uniquely found at the CHD4 gene.  
543 If ZNF410 requires a cooperative mechanism for chromatin binding, this may explain lack  
544 of binding to the majority of single motifs. 3) The weak ZNF410 binding that is found at 6  
545 sites containing a single motif is accompanied by the presence of active histone marks  
546 and signatures of open chromatin. It is possible that when exposed, single motifs might  
547 allow access to ZNF410 even if it is functionally inconsequential. Indeed, ZNF410  
548 depletion or dominant interfering ZNF410 version elicited no transcriptional changes of  
549 the 6 ZNF410-bound genes with a single motif.

550

551 The ZF domain of ZNF410 is necessary and sufficient for DNA binding in vitro and in vivo.



552 Crystallographic analysis of the ZF domain bound to DNA revealed a binding mode in  
553 which ZF1-ZF5 are contacting the consensus sequence in a 3' to 5' orientation with all  
554 five ZFs contacting DNA. EMSA experiments suggest, however, that four ZFs (either ZF1-  
555 4 or ZF2-5) are needed for efficient binding. Whether ZNF410 versions with fewer ZFs  
556 can achieve similar chromatin occupancy patterns as wild-type ZNF410 will be interesting  
557 to investigate in future experiments. Fluorescence polarization experiments measured the  
558 ZF domain-DNA interaction  $K_D$  at 22nM. Yet, this high affinity interaction appears  
559 insufficient to enable chromatin occupancy at virtually all single elements in the genome.  
560 Hence, the clustering of motifs may be required to convey efficient and high level  
561 chromatin binding. The molecular basis for binding co-operativity is unclear. Since the ZF  
562 domain displays no activation activity on its own and therefore might not interact with co-  
563 activator complexes, binding cooperativity might derive from the inherently synergistic  
564 effects of DNA binding domains when displacing histone-DNA interactions in  
565 nucleosomes (Adams and Workman, 1995; Oliviero and Struhl, 1991; Polach and Widom,  
566 1996). Whether the spacing of the ZNF410 motifs allows for such synergistic behavior  
567 remains to be tested.

568

569 When overexpressed, the ZF domain acted in a dominant interfering manner by  
570 displacing endogenous ZNF410 from the CHD4 locus. The resulting reduction in CHD4  
571 transcription was ~65%-70%, comparable to that observed upon ZNF410 knockout. The  
572 expression of 6 other ZNF410 bound genes were unaffected, again illustrating ZNF410  
573 specificity. One implication of this finding is that the transactivation function of ZNF410  
574 resides outside the ZF domain, and that, by inference, the ZF domain may not be involved

575 in co-activator recruitment. This contrasts with other zinc finger transcription factors, such  
576 as GATA1 where the ZF region can be multifunctional and not only bind DNA but also  
577 critical co-regulators (Campbell et al., 2013). Finally, according to our ChIP-seq  
578 experiments, the ZF domain binding profiles are very similar to full length ZNF410,  
579 suggesting that the ZNF410 chromatin binding specificity and affinity is determined solely  
580 by the ZF domain, and that other domains and associated cofactors contribute little if at  
581 all to ZNF410 binding.

582

583 Sequence variants at binding sites for the  $\gamma$ -globin repressors BCL11A and LRF (ZBTB7A)  
584 are linked to persistence of  $\gamma$ -globin expression into adulthood (Liu et al., 2018; Martyn et  
585 al., 2018). We interrogated GWAS Central databases as well as a sequencing database  
586 we generated (unpublished data) for SNPs within the CHD4 regulatory regions that might  
587 be linked to elevated HbF levels but found none. Given the large number of ZNF410  
588 elements at the CHD4 locus, multiple elements would need to be lost in order to  
589 significantly affect CHD4 transcription. It is thus possible that motif clustering at the CHD4  
590 locus provides robustness for the maintenance of CHD4 expression.

591

592 Complete CHD4 loss severely compromises hematopoiesis and erythroid cell growth  
593 (Sher et al., 2019; Xu et al., 2013; Yoshida et al., 2008). However, depletion of ZNF410  
594 is well tolerated in erythroid cells and other hematopoietic lineages, which is likely due to  
595 the fact that CHD4 is not completely extinguished. This partial CHD4 reduction was  
596 sufficient to robustly de-repress the  $\gamma$ -globin genes, consistent with a prior study (Amaya

597 et al., 2013). Notably, given the very limited global transcriptional changes upon ZNF410  
598 depletion, this suggests that the  $\gamma$ -globin genes are especially sensitive to NuRD levels.

599

600

601 In sum, we identified ZNF410 as a highly specific regulator of CHD4 expression and  $\gamma$ -  
602 globin silencing. It might be possible to exploit this high transcriptional selectivity and  
603 target ZNF410 to raise fetal hemoglobin expression for the treatment of  
604 hemoglobinopathies.

605

606

607

608

609

610

611

612

613

614

615

616

617

618

619

620 **Data and Code Availability**

621

622 The X-ray structures (coordinates and structure factor files) of ZNF410 ZF domain with  
623 bound DNA have been submitted to PDB under accession number 6WMI.

624 The RNA-seq and CHIP-seq data have been deposited to GEO database (GSE154963).

625

626 **Acknowledgments**

627

628 The authors thank Dr. Shaun Mahony, Dr. Xing Zhang and members of the Blobel  
629 laboratory for helpful comments and discussions, and the CHOP flow cytometry core for  
630 help with cell sorting. The authors also thank the following core facilities and individuals  
631 at St. Jude Children's Research Hospital: Flow Cytometry (Richard Ashmun, Jonathan  
632 Laxton and Stacie Woolard), Animal Resource Center (Chandra Savage), Center for  
633 advance genome editing (Shondra Miller and Shaina Porter), and Animal maintenance  
634 (Kalin Mayberry).

635

636 This work was supported by NIH grants R24DK106766 (G.A.B. and R.C.H.),  
637 R01HL119479 (G.A.B.), R35GM134744 (X.C.), CPRIT RR160029 (X.C.), Australian  
638 National Health and Medical Research Council APP1164920 (M.C.), a scholarship by  
639 Australian Government Research Training Program (L.C.L.), the St. Jude sponsored CRC  
640 consortium, and a fellowship by the Cooley's anemia foundation (X.L.). We thank the Di  
641 Gaetano family for their generous support.

642

643 **Author Contributions**

644

645 X.L. J.S., and G.A.B. conceived the study and designed the experiments. X.L., N.A., and  
646 O.A. performed experiments. J.D.G., and J.S. performed CRISPR-screen. R.R.  
647 performed protein purification, DNA binding assays and crystallization. R.R. and J.R.H.  
648 performed X-ray data collection and structure determination. X.C organized and designed  
649 the scope of the structural study. R.F. and T.M. performed mouse xenotransplantation  
650 experiments, and R.F., T.M. and M.J.W. analyzed the data. L.C.L and M.C carried out the  
651 band retardation experiments. X.L. Y.L., Z.Z., B.G., R.C.H. and K.Q. analyzed ChIP-seq  
652 and RNA-seq data. X.L. and G.A.B. analyzed data. X.L. and G.A.B. wrote the manuscript  
653 with input from all authors.

654

655

656 **Declaration of Interests**

657

658 The authors declare no competing interests.

659

660

661

662

663

664

665

## 666 References:

- 667 Adams, C.C., and Workman, J.L. (1995). Binding of disparate transcriptional activators to  
668 nucleosomal DNA is inherently cooperative. *Mol Cell Biol* *15*, 1405-1421.
- 669 Adams, P.D., Grosse-Kunstleve, R.W., Hung, L.W., Ioerger, T.R., McCoy, A.J., Moriarty, N.W., Read,  
670 R.J., Sacchettini, J.C., Sauter, N.K., and Terwilliger, T.C. (2002). PHENIX: building new software for  
671 automated crystallographic structure determination. *Acta Crystallogr D Biol Crystallogr* *58*, 1948-  
672 1954.
- 673 Amaya, M., Desai, M., Gnanapragasam, M.N., Wang, S.Z., Zu Zhu, S., Williams, D.C., Jr., and Ginder,  
674 G.D. (2013). Mi2beta-mediated silencing of the fetal gamma-globin gene in adult erythroid cells.  
675 *Blood* *121*, 3493-3501.
- 676 Andrews, N.C., and Faller, D.V. (1991). A rapid micropreparation technique for extraction of DNA-  
677 binding proteins from limiting numbers of mammalian cells. *Nucleic acids research* *19*, 2499.
- 678 Bak, R.O., Dever, D.P., and Porteus, M.H. (2018). CRISPR/Cas9 genome editing in human  
679 hematopoietic stem cells. *Nat Protoc* *13*, 358-376.
- 680 Benanti, J.A., Williams, D.K., Robinson, K.L., Ozer, H.L., and Galloway, D.A. (2002). Induction of  
681 extracellular matrix-remodeling genes by the senescence-associated protein APA-1. *Mol Cell Biol*  
682 *22*, 7385-7397.
- 683 Campbell, A.E., Wilkinson-White, L., Mackay, J.P., Matthews, J.M., and Blobel, G.A. (2013).  
684 Analysis of disease-causing GATA1 mutations in murine gene complementation systems. *Blood*  
685 *121*, 5218-5227.
- 686 Crossley, M., Whitelaw, E., Perkins, A., Williams, G., Fujiwara, Y., and Orkin, S.H. (1996). Isolation  
687 and characterization of the cDNA encoding BKLf/TEF-2, a major CACCC-box-binding protein in  
688 erythroid cells and selected other cells. *Mol Cell Biol* *16*, 1695-1705.
- 689 Emsley, P., and Cowtan, K. (2004). Coot: model-building tools for molecular graphics. *Acta*  
690 *Crystallogr D Biol Crystallogr* *60*, 2126-2132.
- 691 Grevet, J.D., Lan, X., Hamagami, N., Edwards, C.R., Sankaranarayanan, L., Ji, X., Bhardwaj, S.K.,  
692 Face, C.J., Posocco, D.F., Abdulmalik, O., *et al.* (2018). Domain-focused CRISPR screen identifies  
693 HRI as a fetal hemoglobin regulator in human erythroid cells. *Science* *361*, 285-290.
- 694 Hendrickson, W.A., Horton, J.R., and LeMaster, D.M. (1990). Selenomethionyl proteins produced  
695 for analysis by multiwavelength anomalous diffraction (MAD): a vehicle for direct determination  
696 of three-dimensional structure. *EMBO J* *9*, 1665-1672.
- 697 Hong, W., Nakazawa, M., Chen, Y.Y., Kori, R., Vakoc, C.R., Rakowski, C., and Blobel, G.A. (2005).  
698 FOG-1 recruits the NuRD repressor complex to mediate transcriptional repression by GATA-1.  
699 *EMBO J* *24*, 2367-2378.
- 700 Horowitz, S., and Trievel, R.C. (2012). Carbon-oxygen hydrogen bonding in biological structure  
701 and function. *J Biol Chem* *287*, 41576-41582.
- 702 Hsu, S.C., Gilgenast, T.G., Bartman, C.R., Edwards, C.R., Stonestrom, A.J., Huang, P., Emerson, D.J.,  
703 Evans, P., Werner, M.T., Keller, C.A., *et al.* (2017). The BET Protein BRD2 Cooperates with CTCF to  
704 Enforce Transcriptional and Architectural Boundaries. *Mol Cell* *66*, 102-116 e107.
- 705 Huang, P., Keller, C.A., Giardine, B., Grevet, J.D., Davies, J.O.J., Hughes, J.R., Kurita, R., Nakamura,  
706 Y., Hardison, R.C., and Blobel, G.A. (2017). Comparative analysis of three-dimensional  
707 chromosomal architecture identifies a novel fetal hemoglobin regulatory element. *Genes Dev* *31*,  
708 1704-1713.

709 Huang, P., Peslak, S.A., Lan, X., Khandros, E., Yano, J.A., Sharma, M., Keller, C.A., Giardine, B., Qin,  
710 K., Abdulmalik, O., *et al.* (2020). The HRI-regulated transcription factor ATF4 activates BCL11A  
711 transcription to silence fetal hemoglobin expression. *Blood* 135, 2121-2132.

712 Jacob, F., Perrin, D., Sanchez, C., and Monod, J. (1960). [Operon: a group of genes with the  
713 expression coordinated by an operator]. *C R Hebd Seances Acad Sci* 250, 1727-1729.

714 Jolma, A., Yan, J., Whittington, T., Toivonen, J., Nitta, K.R., Rastas, P., Morgunova, E., Enge, M.,  
715 Taipale, M., Wei, G., *et al.* (2013). DNA-binding specificities of human transcription factors. *Cell*  
716 152, 327-339.

717 Kurita, R., Suda, N., Sudo, K., Miharada, K., Hiroyama, T., Miyoshi, H., Tani, K., and Nakamura, Y.  
718 (2013). Establishment of immortalized human erythroid progenitor cell lines able to produce  
719 enucleated red blood cells. *PLoS One* 8, e59890.

720 Langmead, B., and Salzberg, S.L. (2012). Fast gapped-read alignment with Bowtie 2. *Nat Methods*  
721 9, 357-359.

722 Lejon, S., Thong, S.Y., Murthy, A., AlQarni, S., Murzina, N.V., Blobel, G.A., Laue, E.D., and Mackay,  
723 J.P. (2011). Insights into association of the NuRD complex with FOG-1 from the crystal structure  
724 of an RbAp48.FOG-1 complex. *J Biol Chem* 286, 1196-1203.

725 Liu, N., Hargreaves, V.V., Zhu, Q., Kurland, J.V., Hong, J., Kim, W., Sher, F., Macias-Trevino, C.,  
726 Rogers, J.M., Kurita, R., *et al.* (2018). Direct Promoter Repression by BCL11A Controls the Fetal to  
727 Adult Hemoglobin Switch. *Cell* 173, 430-442 e417.

728 Love, P.E., Warzecha, C., and Li, L. (2014). Ldb1 complexes: the new master regulators of  
729 erythroid gene transcription. *Trends Genet* 30, 1-9.

730 Lu, B., Klingbeil, O., Tarumoto, Y., Somerville, T.D.D., Huang, Y.H., Wei, Y., Wai, D.C., Low, J.K.K.,  
731 Milazzo, J.P., Wu, X.S., *et al.* (2018). A Transcription Factor Addiction in Leukemia Imposed by the  
732 MLL Promoter Sequence. *Cancer Cell* 34, 970-981 e978.

733 Ludwig, L.S., Lareau, C.A., Bao, E.L., Nandakumar, S.K., Muus, C., Ulirsch, J.C., Chowdhary, K.,  
734 Buenrostro, J.D., Mohandas, N., An, X., *et al.* (2019). Transcriptional States and Chromatin  
735 Accessibility Underlying Human Erythropoiesis. *Cell reports* 27, 3228-3240 e3227.

736 Luscombe, N.M., Laskowski, R.A., and Thornton, J.M. (2001). Amino acid-base interactions: a  
737 three-dimensional analysis of protein-DNA interactions at an atomic level. *Nucleic Acids Res* 29,  
738 2860-2874.

739 Martyn, G.E., Wienert, B., Yang, L., Shah, M., Norton, L.J., Burdach, J., Kurita, R., Nakamura, Y.,  
740 Pearson, R.C.M., Funnell, A.P.W., *et al.* (2018). Natural regulatory mutations elevate the fetal  
741 globin gene via disruption of BCL11A or ZBTB7A binding. *Nat Genet* 50, 498-503.

742 Masuda, T., Wang, X., Maeda, M., Canver, M.C., Sher, F., Funnell, A.P., Fisher, C., Suci, M.,  
743 Martyn, G.E., Norton, L.J., *et al.* (2016). Transcription factors LRF and BCL11A independently  
744 repress expression of fetal hemoglobin. *Science* 351, 285-289.

745 McIntosh, B.E., Brown, M.E., Duffin, B.M., Maufort, J.P., Vereide, D.T., Slukvin, I., and Thomson,  
746 J.A. (2015). Nonirradiated NOD.B6.SCID Il2rgamma-/- Kit(W41/W41) (NBSGW) mice support  
747 multilineage engraftment of human hematopoietic cells. *Stem Cell Reports* 4, 171-180.

748 Menzel, S., Garner, C., Gut, I., Matsuda, F., Yamaguchi, M., Heath, S., Foglio, M., Zelenika, D.,  
749 Boland, A., Rooks, H., *et al.* (2007). A QTL influencing F cell production maps to a gene encoding  
750 a zinc-finger protein on chromosome 2p15. *Nat Genet* 39, 1197-1199.

751 Metais, J.Y., Doerfler, P.A., Mayuranathan, T., Bauer, D.E., Fowler, S.C., Hsieh, M.M., Katta, V.,  
752 Keriwala, S., Lazzarotto, C.R., Luk, K., *et al.* (2019). Genome editing of HBG1 and HBG2 to induce  
753 fetal hemoglobin. *Blood Adv* 3, 3379-3392.

754 Oliviero, S., and Struhl, K. (1991). Synergistic transcriptional enhancement does not depend on  
755 the number of acidic activation domains bound to the promoter. *Proc Natl Acad Sci U S A* 88, 224-  
756 228.

757 Otwinowski, Z., Borek, D., Majewski, W., and Minor, W. (2003). Multiparametric scaling of  
758 diffraction intensities. *Acta Crystallogr A* 59, 228-234.

759 Patel, A., Hashimoto, H., Zhang, X., and Cheng, X. (2016a). Characterization of How DNA  
760 Modifications Affect DNA Binding by C2H2 Zinc Finger Proteins. *Methods Enzymol* 573, 387-401.

761 Patel, A., Horton, J.R., Wilson, G.G., Zhang, X., and Cheng, X. (2016b). Structural basis for human  
762 PRDM9 action at recombination hot spots. *Genes Dev* 30, 257-265.

763 Patel, A., Yang, P., Tinkham, M., Pradhan, M., Sun, M.A., Wang, Y., Hoang, D., Wolf, G., Horton,  
764 J.R., Zhang, X., *et al.* (2018). DNA Conformation Induces Adaptable Binding by Tandem Zinc Finger  
765 Proteins. *Cell* 173, 221-233 e212.

766 Patel, A., Zhang, X., Blumenthal, R.M., and Cheng, X. (2017). Structural basis of human PR/SET  
767 domain 9 (PRDM9) allele C-specific recognition of its cognate DNA sequence. *J Biol Chem* 292,  
768 15994-16002.

769 Pennacchio, L.A., Ahituv, N., Moses, A.M., Prabhakar, S., Nobrega, M.A., Shoukry, M., Minovitsky,  
770 S., Dubchak, I., Holt, A., Lewis, K.D., *et al.* (2006). In vivo enhancer analysis of human conserved  
771 non-coding sequences. *Nature* 444, 499-502.

772 Platt, O.S., Brambilla, D.J., Rosse, W.F., Milner, P.F., Castro, O., Steinberg, M.H., and Klug, P.P.  
773 (1994). Mortality in sickle cell disease. Life expectancy and risk factors for early death. *N Engl J*  
774 *Med* 330, 1639-1644.

775 Polach, K.J., and Widom, J. (1996). A model for the cooperative binding of eukaryotic regulatory  
776 proteins to nucleosomal target sites. *J Mol Biol* 258, 800-812.

777 Sankaran, V.G., Menne, T.F., Xu, J., Akie, T.E., Lettre, G., Van Handel, B., Mikkola, H.K., Hirschhorn,  
778 J.N., Cantor, A.B., and Orkin, S.H. (2008). Human fetal hemoglobin expression is regulated by the  
779 developmental stage-specific repressor BCL11A. *Science* 322, 1839-1842.

780 Sher, F., Hossain, M., Seruggia, D., Schoonenberg, V.A.C., Yao, Q., Cifani, P., Dassama, L.M.K., Cole,  
781 M.A., Ren, C., Vinjamur, D.S., *et al.* (2019). Rational targeting of a NuRD subcomplex guided by  
782 comprehensive in situ mutagenesis. *Nat Genet* 51, 1149-1159.

783 Shi, J., Wang, E., Milazzo, J.P., Wang, Z., Kinney, J.B., and Vakoc, C.R. (2015). Discovery of cancer  
784 drug targets by CRISPR-Cas9 screening of protein domains. *Nat Biotechnol* 33, 661-667.

785 Siepel, A., Bejerano, G., Pedersen, J.S., Hinrichs, A.S., Hou, M., Rosenbloom, K., Clawson, H.,  
786 Spieth, J., Hillier, L.W., Richards, S., *et al.* (2005). Evolutionarily conserved elements in vertebrate,  
787 insect, worm, and yeast genomes. *Genome Res* 15, 1034-1050.

788 Srivastava, D., and Mahony, S. (2020). Sequence and chromatin determinants of transcription  
789 factor binding and the establishment of cell type-specific binding patterns. *Biochim Biophys Acta*  
790 *Gene Regul Mech* 1863, 194443.

791 Terwilliger, T.C., Adams, P.D., Read, R.J., McCoy, A.J., Moriarty, N.W., Grosse-Kunstleve, R.W.,  
792 Afonine, P.V., Zwart, P.H., and Hung, L.W. (2009). Decision-making in structure solution using  
793 Bayesian estimates of map quality: the PHENIX AutoSol wizard. *Acta Crystallogr D Biol Crystallogr*  
794 65, 582-601.



795 Torrado, M., Low, J.K.K., Silva, A.P.G., Schmidberger, J.W., Sana, M., Sharifi Tabar, M., Isilak, M.E.,  
796 Winning, C.S., Kwong, C., Bedward, M.J., *et al.* (2017). Refinement of the subunit interaction  
797 network within the nucleosome remodelling and deacetylase (NuRD) complex. *FEBS J* 284, 4216-  
798 4232.

799 Uda, M., Galanello, R., Sanna, S., Lettre, G., Sankaran, V.G., Chen, W., Usala, G., Busonero, F.,  
800 Maschio, A., Albai, G., *et al.* (2008). Genome-wide association study shows BCL11A associated  
801 with persistent fetal hemoglobin and amelioration of the phenotype of beta-thalassemia. *Proc*  
802 *Natl Acad Sci U S A* 105, 1620-1625.

803 Wang, E., Kawaoka, S., Roe, J.S., Shi, J., Hohmann, A.F., Xu, Y., Bhagwat, A.S., Suzuki, Y., Kinney,  
804 J.B., and Vakoc, C.R. (2015). The transcriptional cofactor TRIM33 prevents apoptosis in B  
805 lymphoblastic leukemia by deactivating a single enhancer. *Elife* 4, e06377.

806 Wang, X., Crispino, J.D., Letting, D.L., Nakazawa, M., Poncz, M., and Blobel, G.A. (2002). Control  
807 of megakaryocyte-specific gene expression by GATA-1 and FOG-1: role of Ets transcription factors.  
808 *EMBO J* 21, 5225-5234.

809 Weiss, M.J., Yu, C., and Orkin, S.H. (1997). Erythroid-cell-specific properties of transcription factor  
810 GATA-1 revealed by phenotypic rescue of a gene-targeted cell line. *Mol Cell Biol* 17, 1642-1651.

811 Wienert, B., Martyn, G.E., Funnell, A.P.W., Quinlan, K.G.R., and Crossley, M. (2018). Wake-up  
812 Sleepy Gene: Reactivating Fetal Globin for beta-Hemoglobinopathies. *Trends Genet* 34, 927-940.

813 Wolfe, S.A., Nekludova, L., and Pabo, C.O. (2000). DNA recognition by Cys2His2 zinc finger  
814 proteins. *Annu Rev Biophys Biomol Struct* 29, 183-212.

815 Xu, J., Bauer, D.E., Kerenyi, M.A., Vo, T.D., Hou, S., Hsu, Y.J., Yao, H., Trowbridge, J.J., Mandel, G.,  
816 and Orkin, S.H. (2013). Corepressor-dependent silencing of fetal hemoglobin expression by  
817 BCL11A. *Proc Natl Acad Sci U S A* 110, 6518-6523.

818 Yang, P., Wang, Y., Hoang, D., Tinkham, M., Patel, A., Sun, M.A., Wolf, G., Baker, M., Chien, H.C.,  
819 Lai, K.N., *et al.* (2017). A placental growth factor is silenced in mouse embryos by the zinc finger  
820 protein ZFP568. *Science* 356, 757-759.

821 Yoshida, T., Hazan, I., Zhang, J., Ng, S.Y., Naito, T., Snippert, H.J., Heller, E.J., Qi, X., Lawton, L.N.,  
822 Williams, C.J., *et al.* (2008). The role of the chromatin remodeler Mi-2beta in hematopoietic stem  
823 cell self-renewal and multilineage differentiation. *Genes Dev* 22, 1174-1189.

824

825

## 826 **Methods and materials:**

827

### 828 **Cell culture**

829 HUDEP-2 cells were cultured and differentiated as described previously (Kurita *et al.*,  
830 2013). Briefly, StemSpan™ SFEM supplemented with 50ng/ml human SCF, 10µM  
831 dexamethasone, 1µg/ml doxycycline, 3IU/ml erythropoietin and 1%

832 penicillin/streptomycin was utilized for routine cell maintenance. Cell density was kept at  
833  $0.1-1 \times 10^6$ /ml. HUDEP-2 cells were differentiated for 6-7 days in IMDM supplemented  
834 with 50ng/ml human SCF, 3IU/ml erythropoietin, 2.5% fetal bovine serum, 250 $\mu$ g/ml holo-  
835 transferrin, 10ng/ml heparin, 10 $\mu$ g/ml insulin, 1 $\mu$ g/ml doxycycline and 1%  
836 penicillin/streptomycin.

837

838 Primary human CD34+ HSPCs from mobilized peripheral blood were purchased from the  
839 Fred Hutchinson Cancer Research Center. Human CD34+ HSPCs were differentiated  
840 using a three-phase culture system as described previously (Grevet et al., 2018). Briefly,  
841 IMDM supplemented with 3IU/ml erythropoietin, 2.5% human male AB serum, 10ng/ml  
842 heparin, and 10 $\mu$ g/ml insulin was used as base medium. For phase I medium, 100ng/ml  
843 human SCF, 5ng/ml IL-3, and 250 $\mu$ g/ml holo-transferrin were supplemented. For phase  
844 II medium, 100ng/ml human SCF and 250 $\mu$ g/ml holo-transferrin were supplemented. For  
845 phase III medium, 1.25mg/ml holo-transferrin was supplemented.

846

847 HEK293T cells were grown in DMEM supplemented with 10% fetal bovine serum, 2%  
848 penicillin/streptomycin, 1% L-glutamine and 100 $\mu$ M sodium pyruvate according to  
849 standard protocol.

850

851 K562 cells were cultured in IMDM supplemented with 10% fetal bovine serum and 1%  
852 penicillin/streptomycin.

853

854 G1E-ER4 cells are a sub-line of G1E cells, (derived from GATA1 KO murine embryonic  
855 stem cells (Weiss et al., 1997)), which express GATA1 fused to the ligand binding domain  
856 of the estrogen receptor (GATA1-ER) (Weiss et al., 1997). GATA1 activation and  
857 erythroid differentiation are induced by the addition of 100 nM estradiol to the media for  
858 24 hours. G1E-ER4 were cultured in IMDM supplemented with 15% FBS, 1%  
859 penicillin/streptomycin, Kit ligand, monothioglycerol and epoetin alpha.

860

861 COS-7 cells were cultured in DMEM supplemented with 10% fetal bovine serum and 1%  
862 penicillin-streptomycin-glutamine (PSG). During passaging, adherent cells were  
863 dislodged after a 2-min incubation at 37 °C with PBS-EDTA (5 mM).

864

#### 865 **Vector construction**

866 SgRNAs were cloned into a lentiviral U6-sgRNA-EFS-GFP/mCherry expression vector  
867 (LRG, Addgene: #65656) by BsmBI digestion. The ZNF410 cDNA (clone ID: OHu10535),  
868 CHD4 cDNA (clone ID: OHu28780) were purchased from GenScript and were sub-cloned  
869 into a lentiviral vector pSDM101-IRES-GFP (from Dr. Patrick Grant lab). The ZF domain  
870 of ZNF410 was also sub-cloned into pSDM101-IRES-GFP vector. The N-terminal HA tag  
871 was introduced by PCR with primer. For EMSA assay, the ZNF410 full length or ZF  
872 domain was sub-cloned into mammalian expression vector pcDNA3.

873

#### 874 **Lentiviral transduction**

875 Lentivirus was produced as described previously (Grevet et al., 2018). Briefly, 10-20 ug  
876 of expression vectors, 5-10ug of pVSVG (pMD2.G) and 7.5-15 ug of psPAX2 package

877 plasmids, and 80 ul of 1 mg/ml polyethylenimine (PEI) were mixed, incubated and added  
878 to the 10 cm plate HEK293T cells above 90% confluence, media was replaced 6-8 hr post  
879 transfection, virus was collected 24 hours and 48 hours post-transfection and pooled. For  
880 infection, virus-containing supernatant was mixed with the indicated cell lines with 8 ug/ml  
881 polybrene and 10 mM HEPES, and then spin at 2250 rpm for 1.5 hrs at room temperature.  
882 Infected HUDEP-2 or K562 cells were selected by mCherry+ or GFP+ cell sorting 48  
883 hours post-infection. To control cDNA expression levels, the GFP+ low cells were sorted.

884

### 885 **RNP electroporation**

886 Commercial sgRNAs were purchased from IDT or Synthego. To assemble the RNP  
887 complexes, 100 pmol sgRNA and 50 pmol SpCas9 protein (from IDT) were incubated at  
888 room temperature for 15 mins. CD34+ HSPCs (50k-100k) at Day 3-4 of phase I culture  
889 were electroporated using P3 Primary Cell 4D Nucleofector™ X Kit (from Lonza) with  
890 program DZ100 (Bak et al., 2018).

891

### 892 **RT-qPCR**

893 RT-qPCR was performed as described previously (Grevet et al., 2018). Briefly, total RNAs  
894 were purified using the RNeasy Plus Mini Kit (Qiagen) including an on-column DNase  
895 treatment using RNase-free DNase set (Qiagen) to remove genomic DNA. Reverse  
896 transcription was accomplished using iScript Supermix (Bio-Rad). qPCR reactions were  
897 prepared with Power SYBR Green (ThermoFisher Scientific). Quantification was  
898 performed using the  $\Delta\Delta C_T$  method. Primers used for RT-qPCR are listed in Table S1.

899

## 900 **COS cell transfections and nuclear extractions**

901  
902 Nuclear extracts were prepared from COS-7 cells transiently overexpressed with ZNF410  
903 full-length and ZNF410 ZF1-5 plasmids. Fugene 6 (Promega) was used to transfect 5 µg  
904 of vector into 100 mm plates of COS-7 cells. A pcDNA3 empty vector was transfected as  
905 a control. Cells were harvested 48 h after transfection and nuclear extracts prepared as  
906 previously described (Andrews and Faller, 1991). The mammalian expression vectors  
907 used are presented in Table S3.

## 908 909 **In vivo transplantation of CD34+ HSPCs**

910  
911 Xenotransplantation experiments were carried out as previously described (Metais et al.,  
912 2019). Briefly, ZNF410 edited or control CD34+ HSPCs were administered at a dose of  
913 0.4 million per NBSGW mouse (The Jackson Laboratory) by tail-vein injection at aged 8-  
914 12 weeks. Chimerism post-transplantation was assessed by flow analysis at 8 weeks in  
915 the periphery and at 16 weeks in the bone marrow at the time of euthanasia. Cell lineage  
916 composition was determined in the bone marrow using human-specific antibodies, and  
917 different lineages were sorted by a FACSAria III cell sorter. CD34+ HSPCs were isolated  
918 with magnetic beads using the human-specific CD34 MicroBead Kit UltraPure, human  
919 (Miltenyi Biotec Inc). See table S4 for antibodies used in flow cytometry.

## 920 921 **Indel analysis**

922

923 Next-generation sequencing (NGS) was used for indel analysis as previously described  
924 (Metais et al., 2019). Briefly, NGS libraries were prepared with a 2-step PCR protocol. In  
925 the first step, the targeted genomic sites were amplified by PCR with Phusion Hot Start  
926 Flew 2x Master Mix (New England BioLabs) and primers with partial Illumina sequencing  
927 adaptors. In the second step, PCR was performed with a KAPA HiFi HotStart ReadyMix  
928 PCR Kit (Roche) to add Illumina sequencing adaptors (P5-dual-index and P7-dual-index)  
929 to the purified PCR product from the first step. The Illumina MiSeq platform was used to  
930 generate FASTQ sequences with 150 bp paired-end reads, and these reads were  
931 analyzed by joining paired reads and analyzing amplicons, using CRISPResso for indel  
932 measurement. See table S5 for NGS sequencing primers.

933

### 934 **EMSAs**

935

936 EMSAs were carried out as previous described (Crossley et al., 1996). Oligonucleotides  
937 used in the synthesis of radiolabelled probes are listed in Table S6. The sense  
938 oligonucleotide was labelled with [ $\gamma$ -<sup>32</sup>P]-adenosine triphosphate (Perkin Elmer) and  
939 boiled at 100 °C for 1 min before addition of the antisense oligonucleotide and annealing  
940 of probe via slow cooling from 100 °C to room temperature. Probes were purified using  
941 Quick Spin Columns for Radiolabelled DNA Purification (Roche). Nuclear extracts were  
942 harvested from COS-7 cells and samples were loaded on a 6% native polyacrylamide gel  
943 in TBE buffer (45 mM Tris, 45 mM boric acid, 1 mM EDTA). A 'COS empty' control lane  
944 was included to show binding of any background endogenous protein to the probe.  
945 Recognition and super-shifting of FLAG-ZNF410 overexpression constructs was

946 achieved by using the anti-FLAG monoclonal antibody (Sigma). Gels were run at 250 V  
947 for 1h 45 min at 4 °C then dried under vacuum. Gels were exposed overnight with a  
948 FUJIFILM BAS CASETTE2 2025 phosphor screen and imaged using the Typhoon™ FLA  
949 9500 Laser Scanner.

950

### 951 **HbF staining and flow cytometry**

952 HbF staining and flow analysis were performed as described previously (Grevet et al.,  
953 2018).

954

### 955 **CRISPR sgRNA library generation and screen**

956 SgRNA library targeting human transcription factors was described previously (Lu et al.,  
957 2018). CRISPR-Cas9 screen was performed as described previously (Grevet et al.,  
958 2018).

959

### 960 **Western Blot**

961 Western blotting analysis was carried out according to standard protocol with the following  
962 antibodies: ZNF410 (1:500, Proteintech, Cat. # 14529-1-AP), CHD4 (1:500, Proteintech,  
963 Cat. # 14173-1-AP), CHD4 (1:500, Cell Signaling Cat. # 11912S), GATAD2A (1;1000,  
964 Bethyl Laboratories, Cat. # A302-358A-T), HDAC2 (1;1000, Bethyl Laboratories, Cat. #  
965 A300-705A-T), MBD2 (1;1000, Bethyl Laboratories, Cat. # A301-633A-T), MTA2 (1;1000,  
966 Bethyl Laboratories, Cat. # A300-395A-T), HA (1:1000, Cell Signaling Cat. #3724), FLAG  
967 (1:1000, Sigma, Cat. # F1804), BCL11A (1:1000, Abcam, Cat. #19487), LRF (1:1000,  
968 eBioscience Cat. #13E9), GATA1 (1:1000, Santa Cruz, Cat. #sc-265),  $\gamma$ -globin (1:1000,

969 Santa Cruz, Cat. #sc-21756),  $\beta$ -actin (1:1000, Santa-Cruz, Cat. #sc-47778). Secondary  
970 antibodies: anti-rabbit (1:10,000, GE Healthcare, Cat. #NA934V); anti-mouse (1:10,000,  
971 GE Healthcare, Cat. #NA931V) anti-Rat (1: 5,000, ThermoFisher Scientific, Cat. #31470),  
972 anti-Hamster (1: 5,000, ThermoFisher Scientific, **Cat. # PA1-32045**).

973

#### 974 **RNA-Seq**

975 Total RNAs were purified as described above. Sequencing libraries were then  
976 constructed using 100 ng of purified total RNA using the ScriptSeq Complete Kit (Illumina  
977 cat# BHMR1224) according to manufacturer's protocol. In brief, the RNA was subjected  
978 to rRNA depletion using the Ribo-Zero removal reagents and fragmented. First strand  
979 cDNA was synthesized using a 5' tagged random hexamer, and reversely transcribed,  
980 followed by annealing of a 5' tagged, 3'-end blocked terminal-tagged oligo for second  
981 strand synthesis. The Di-tagged cDNA fragments were purified, barcoded, and PCR-  
982 amplified for 15 cycles.

983

984 The size and quality of each library were then evaluated by Bioanalyzer 2100 (Agilent  
985 Technologies, Santa Clara, CA), and quantified using qPCR. Libraries were sequenced  
986 in paired-end mode on a NextSeq 500 instrument to generate 2 x 76 bp reads using  
987 Illumina-supplied kits. The sequence reads were processed using the ENCODE3 long  
988 RNA-seq pipeline (<https://www.encodeproject.org/pipelines/ENCPL002LPE/>). In brief,  
989 reads were mapped to the human genome (hg38 assembly) using STAR, followed  
990 by RSEM for gene quantifications.

991



992 **RNA-Seq data analysis**

993 The normalized FPKM (fragments per kilo base per million mapped reads) for each gene  
994 was averaged in 2 replicates and then filtered to keep those with average FPKM at least  
995 10 in both HUDEP-2 cells and primary erythroblasts, resulting in ~5000 high abundant  
996 genes each cell type for further analysis. Log2 fold-change was calculated from FPKM of  
997 sgRNA targeting ZNF410 compared to control sgRNA (non-targeting sgRNA) using the  
998 DESeq2 method, and top changed genes were selected with fold-change at least 1.5 and  
999 p-value<0.05. Commonly changed genes in both independent sgRNAs were considered  
1000 to be significant. Scatter plots were generated using ggplot2 in RStudio for all expressed  
1001 genes (FPKM>5).

1002 **ChIP-seq**

1003 HUDEP-2 cells at Day 3 differentiation, primary human CD34+ cells at Day 9  
1004 differentiation and G1E-ER4 cells at 24 hours differentiation were crosslinked with 1%  
1005 formaldehyde at room temperature for 10 min and quenched by the addition of glycine.  
1006 ChIP experiments were performed as previously described (Hsu et al., 2017). ZNF410  
1007 (Proteintech, Cat. # 14529-1-AP), HA (Sigma, Cat. # 11815016001) and H3K27ac  
1008 (Abcam, Cat. # ab4729) antibodies were used for ChIP. ChIP-seq libraries were prepared  
1009 using TruSeq ChIP-seq Sample preparation Kit (part# IP-202-1012) according to the  
1010 manufacturer's instructions. Reads were aligned with Bowtie2 local alignment to allow the  
1011 mapping of indels (Langmead and Salzberg, 2012). All ChIP-seq experiments were  
1012 performed in two biological replicates. ChIP-qPCR was performed with Power SYBR  
1013 Green (ThermoFisher). Primers used for ChIP-qPCR are listed in Table S7.

## 1014 **ZNF410 CHIP-Peak calling and de novo motif analysis**

1015 Reads were aligned against reference genome hg38 using Bowtie2 (v2.2.9) and the  
1016 default parameters. Alignments with MAPQ score lower than 10 and PCR duplicates were  
1017 removed using Samtools (v0.1.19). Reads aligned to mitochondria, random contigs and  
1018 ENCODE blacklisted regions were also removed for downstream analysis. Genome  
1019 coverage files were generated and normalized to 1 million reads per library using bedtools  
1020 (v2.25.0), and then converted to bigwig format for visualization using the UCSC Toolkit.  
1021 Peaks were called using MACS2 (v2.1.0) and a 0.05 q-value cutoff. The final peaks were  
1022 those overlapped by both ZNF410 replicates but not in control replicates (empty vector  
1023 and knock-out samples), then manually filtered to exclude peaks near  
1024 centromere/telomere regions that did not look like peaks on genome browser (total  
1025 number reduced from 38 to 8). The final peaks were extended by 1kb on both ends for  
1026 de novo motif analysis using the HOMER tool, and the top hit motif was scanned across  
1027 the entire genome using HOMER. We also scanned the human and mouse genome for  
1028 motif pattern of CATCCATAATA and other similar motifs using EMBOSS fuzznuc  
1029 (v6.5.7.0). Read density plot and heatmap around selected peaks were generated  
1030 using Deeptools (version 2.5.7, “computeMatrix” and “plotHeatmap”).

1031

1032

## 1033 **HPLC**

1034 ~1 million cells were lysed in water for 10 mins, vortex 10 sec every 5 mins at RT.  
1035 Hemolysates were then cleared by centrifugation at 15,000 rpm, 10 mins and analyzed  
1036 for identity and levels of hemoglobin variants (HbF and HbA) by cation-exchange high-

1037 performance liquid chromatography (HPLC). Hitachi D-7000 Series (Hitachi Instruments,  
1038 Inc., San Jose, CA), and weak cation-exchange column (Poly CAT A: 35 mm x 4.6 mm,  
1039 Poly LC, Inc., Columbia, MD) were used. Hemoglobin isotype peaks were eluted with a  
1040 linear gradient of phase B from 0% to 80% at  $A_{410nm}$  (Mobile Phase A: 20 mM Bis-Tris, 2  
1041 mM KCN, pH 6.95; Phase B: 20 mM Bis-Tris, 2 mM KCN, 0.2 M sodium chloride, pH 6.55).  
1042 Cleared lysates from normal human cord blood samples (high HbF content), as well as a  
1043 commercial standard containing approximately equal amounts of HbF, A, S and C  
1044 (Helena Laboratories, Beaumont, TX), were utilized as reference isotypes.

1045

#### 1046 **Wright-Giemsa staining**

1047 ~100,000 cells were spun onto glass slides with Cytospin4 (ThermoFisher Scientific) at  
1048 1,200rpm for 3 min. Slides were allowed to dry for 5 minutes at RT, followed by staining  
1049 with May Grünwald (Sigma Aldrich) for 2 minutes and then by 1:20 diluted Giemsa stain  
1050 (Sigma Aldrich) for 10 minutes. The stained slides were rinsed twice in water and then  
1051 allowed to dry for 10 minutes before a coverslip was sealed on the preparation with  
1052 Cytoseal 60 (Thermo Scientific). The images were captured with Olympus BX60  
1053 microscope at 10X resolution using Infinity software (Lumenera corporation).

1054

#### 1055 **Protein expression and purification**

1056

1057 The fragment of Human ZNF410 (NP\_001229855.1) comprising of five zinc finger  
1058 domains ZF1-5 (residues 217-366) was cloned into pGEX-6P-1 vector with a GST fusion  
1059 tag (pXC2180). The plasmid was transformed into *Escherichia coli* strain BL21-Codon-

1060 plus(DE3)-RIL (Stratagene). Bacteria was grown in LB broth in a shaker at 37°C until  
1061 reaching the log phase ( $A_{600\text{nm}}$  between 0.4 and 0.5), the shaker temperature was then  
1062 set to 16°C and 25  $\mu\text{M}$   $\text{ZnCl}_2$  was added to the cell culture. When the shaker temperature  
1063 reached 16°C and  $A_{600\text{nm}}$  reached  $\sim 0.8$ , the protein expression was induced by the  
1064 addition of 0.2 mM isopropyl- $\beta$ -D-thiogalactopyranoside with subsequent growth for 20 h  
1065 at 16°C. Cell harvesting and protein purification were carried out at 4°C through a three-  
1066 column chromatography protocol (Patel et al., 2016a), conducted in a BIO-RAD NGC™  
1067 system. Cells were collected by centrifugation and pellet was suspended in the lysis buffer  
1068 consisting of 20 mM Tris-HCl, pH 7.5, 500 mM NaCl, 5% glycerol, 0.5 mM tris(2-  
1069 carboxyethyl)phosphine (TCEP) and 25  $\mu\text{M}$   $\text{ZnCl}_2$ . Cells were lysed by sonication and 0.3%  
1070 (w/v) polyethylenimine was slowly titrated into the cell lysate before centrifugation (Patel  
1071 et al., 2016a). Cell debris was removed by centrifugation for 30 min at 47,000 xg and the  
1072 supernatant was loaded onto a 5 ml GStap column (GE Healthcare). The resin was  
1073 washed by the lysis buffer and bound protein was eluted with elution buffer of 100 mM  
1074 Tris-HCl, pH 8.0, 500 mM NaCl, 5% glycerol, 0.5 mM TCEP and 20 mM reduced form  
1075 glutathione. The GST fusion were digested with PreScission protease (produced in-house)  
1076 to remove the GST fusion tag. The cleaved protein was loaded onto a 5 ml Heparin  
1077 column (GE Healthcare). The protein was eluted by a NaCl gradient from 0.25 to 1 M in  
1078 20 mM Tris-HCl, pH 7.5, 5% glycerol and 0.5 mM TCEP. The peak fractions were pooled,  
1079 concentrated and loaded onto a HiLoad 16/60 Superdex S200 column (GE Healthcare)  
1080 equilibrated with 20 mM Tris-HCl, pH 7.5, 250 mM NaCl, 5% glycerol and 0.5 mM TCEP.  
1081 The protein was frozen and stored at -80°C.

1082

1083 **DNA binding assays**

1084

1085 Fluorescence polarization (FP) method was used to measure the binding affinity using a  
1086 Synergy 4 Microplate Reader (BioTek). Aliquots (5 nM) of 6-carboxy-fluorescein (FAM)-  
1087 labeled DNA duplex (FAM-5'-CACA TCC CAT AAT AATG-3' and 3'-GTGT AGG GTA  
1088 TTA TTAC-5') and control (FAM-5'-TCC ACT GCC AGG ACC TTT-3' and 3'-GGT GAC  
1089 GGT CCT GGA AAA-5') was incubated with varied amount of proteins (0 to 2.5  $\mu$ M) in 20  
1090 mM Tris-HCl, pH 7.5, 300 mM NaCl, 5% glycerol and 0.5 mM TCEP for 10 min at room  
1091 temperature. The data were processed using Graphpad Prism (version 8.0) with equation  
1092  $[mP] = [\text{maximum } mP] \times [C] / (K_D + [C]) + [\text{baseline } mP]$ , in which mP is millipolarization  
1093 and [C] is protein concentration. The  $K_D$  value for each protein–DNA interaction was  
1094 derived from two replicated experiments.

1095

1096 Electrophoretic mobility shift assay (EMSA) was performed with the same set of samples  
1097 used in the FP assay for 10min at room temperature. Aliquots of 10  $\mu$ l of reactions were  
1098 loaded onto an 8% native 1x TBE polyacrylamide gel and run at 150V for 20 min in 0.5x  
1099 TBE buffer. The gel was imaged using a ChemiDoc Imaging System (BIO-RAD).

1100

1101

1102 **Crystallography**

1103

1104 The ZF-DNA complex was prepared by mixing 0.9 mM ZF1-5 fragment and double-  
1105 stranded DNA oligo (annealed in buffer containing 10 mM Tris-HCl, pH 7.5, and 50 mM

1106 NaCl) with molar ratio 1:1.2 of protein to DNA on ice for 30 min incubation. The protein-  
1107 DNA complex crystals were grown using the sitting drop vapor diffusion method via an  
1108 Art Robbins Gryphon Crystallization Robot at 19 °C with a well solution of 0.2 M  
1109 ammonium formate and 20% polyethylene glycol 3350. Crystals were flash frozen using  
1110 20% (v/v) ethylene glycol as the cryo-protectant. The X-ray diffraction data were collected  
1111 at SER-CAT 22-ID beamline of the Advanced Photon Source at Argonne National  
1112 Laboratory utilizing a X-ray beam at 1.0 Å wavelength and processed by HKL2000  
1113 keeping Friedel mates separate (Otwinowski et al., 2003).

1114  
1115 The resultant dataset for ab initio phasing was examined using the PHENIX Xtrige  
1116 module (Adams et al., 2002) which reported a very good anomalous signal to 5.6 Å. The  
1117 PHENIX AutoSol module (Terwilliger et al., 2009) identified the space group being  $P6_2$   
1118 and found all 10 zinc atom positions (5 per each of two molecules in asymmetric unit) with  
1119 a Figure-Of-Merit of 0.48 and gave a density modified map with an R-factor of 0.34 at 5  
1120 Å data. Insertion of these zinc positions into AutoSol and utilizing the full resolution of the  
1121 dataset gave a Figure-Of-Merit of 0.28 and a density modified map with an R-factor of  
1122 0.34. DNA duplex and zinc fingers bound in the major groove could easily be identified  
1123 for the resultant map. The AutoBuild module of PHENIX was utilized for model building,  
1124 and manual fitting of the protein and the DNA duplex was completed with COOT (Emsley  
1125 and Cowtan, 2004), which was also utilized for corrections between PHENIX refinement  
1126 rounds. Structure quality was analyzed during PHENIX refinements and finally validated  
1127 by the PDB validation server. Molecular graphics were generated by using PyMol  
1128 (Schrödinger, LLC).

**Figure 1**

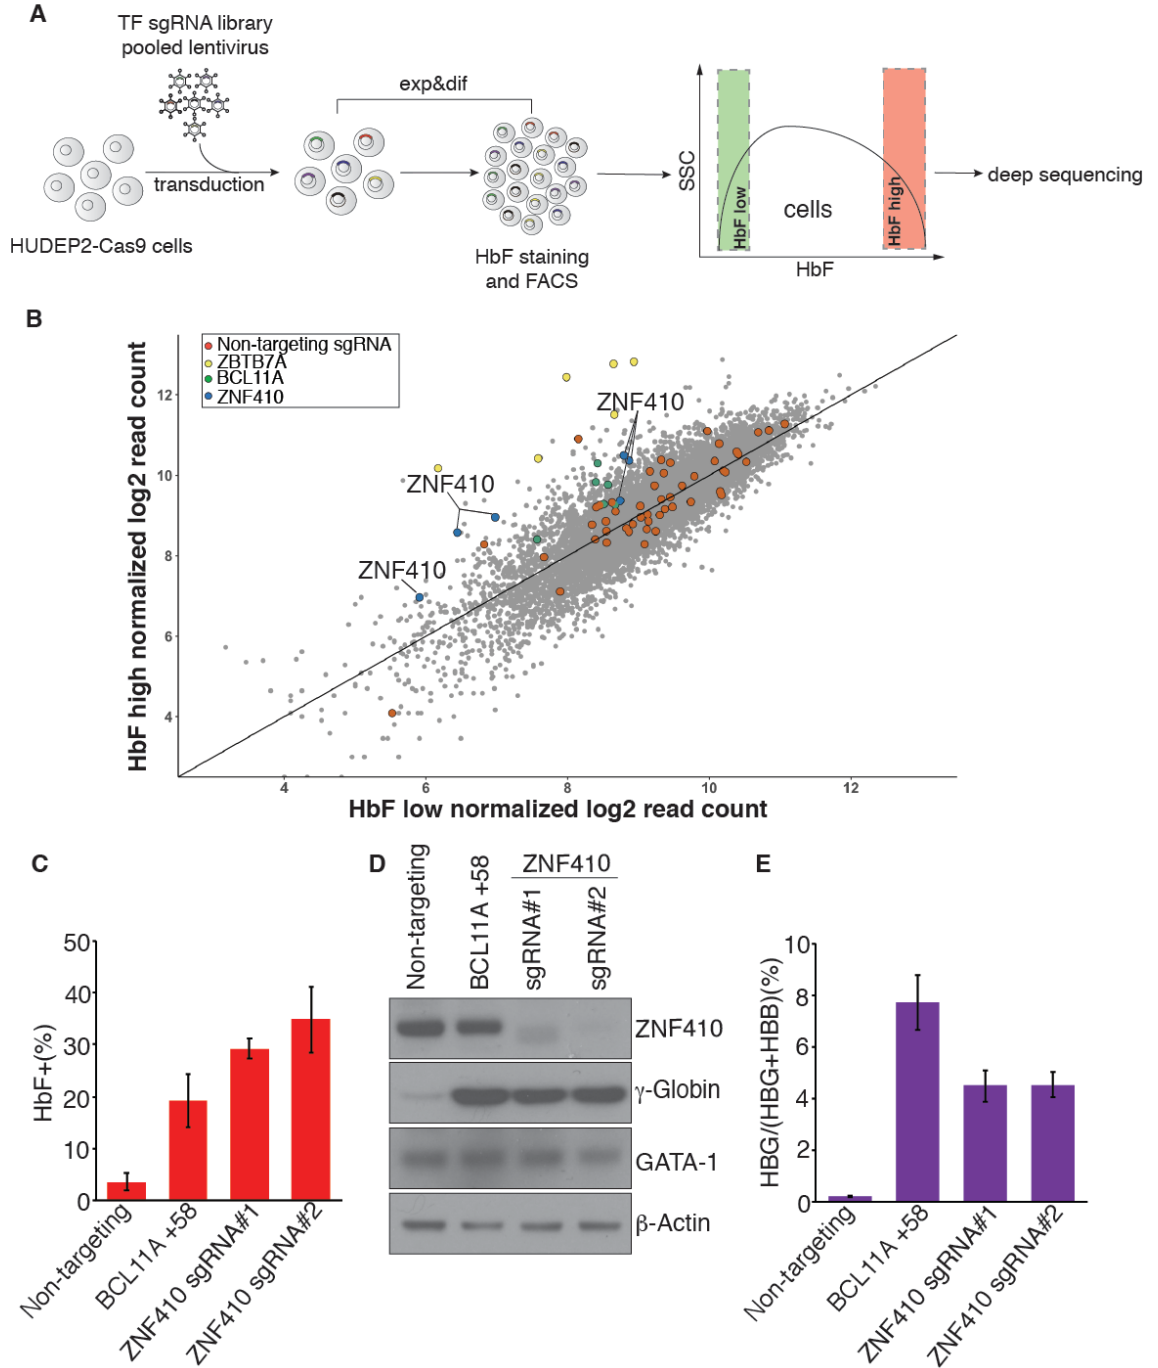

## Figure 1. Domain-focused CRISPR-Cas9 screen identifies ZNF410 as a novel $\gamma$ -globin repressor

(A) Schematic of screening strategy. TF: transcription factor. Exp&dif: expansion and differentiation. FACS: fluorescence-activated cell sorting.

(B) Scatter plot of the screen results. Each dot represents one sgRNA. Control sgRNAs (red dots) are scattered randomly across the diagonal. ZBTB7A (yellow) and BCL11A (green) represent positive control sgRNAs.

(C) Summary of HbF flow cytometric analyses. BCL11A +58: sgRNA targeting the +58 kb erythroid enhancer of the BCL11A gene serves as positive control. Non-targeting sgRNA serves as negative control. Results are shown as mean  $\pm$  SD (n=3).

(D) Immunoblot analysis using whole-cell lysates from differentiated HUDEP-2 cell pools transduced with indicated sgRNAs.

(E)  $\gamma$ -globin mRNA measured by RT-qPCR in differentiated HUDEP-2 cells; data are plotted as percentage of  $\gamma$ -globin over  $\gamma$ -globin+  $\beta$ -globin levels. Results are shown as mean  $\pm$  SD (n=3).



**Figure 2**

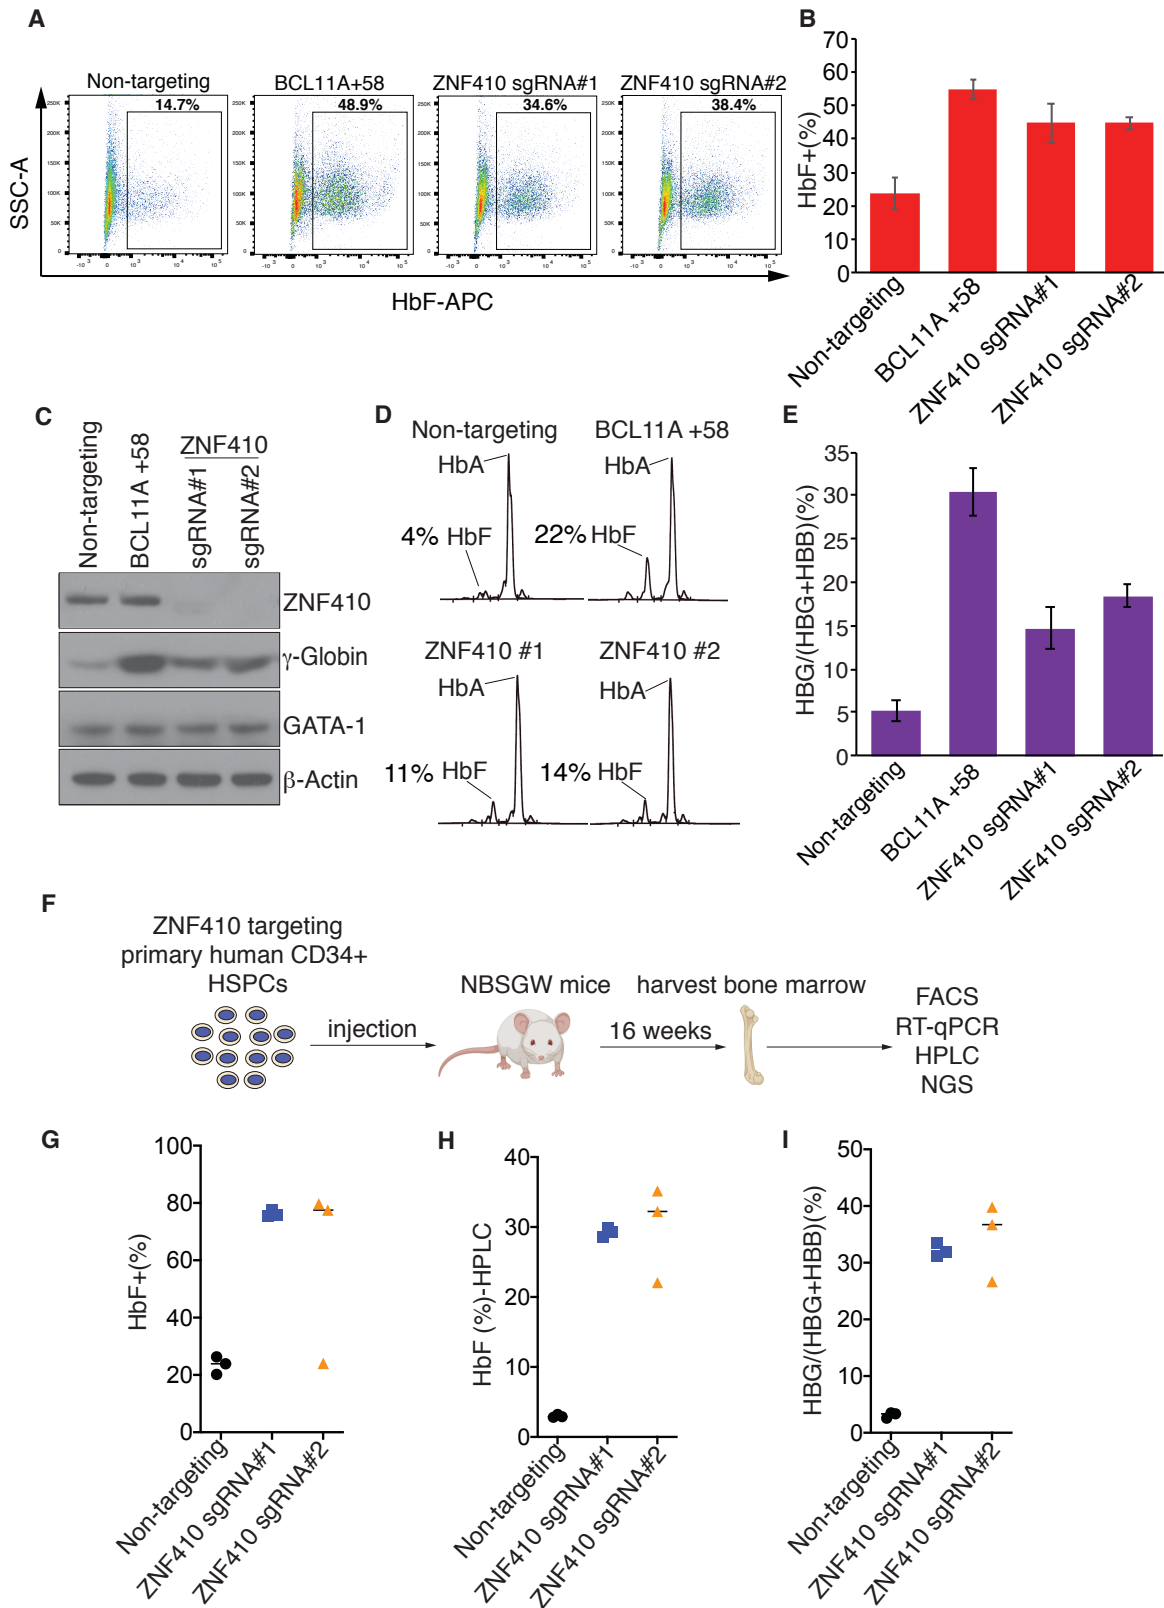

## Figure 2. ZNF410 depletion induces $\gamma$ -globin expression in primary erythroblasts

(A) Representative flow cytometric analysis of cells stained with anti-HbF antibody on day 15 of erythroid differentiation. BCL11A +58: sgRNA targeting the +58 kb erythroid enhancer of the BCL11A gene.

(B) Summary of HbF flow cytometric analyses. Results are shown as mean  $\pm$  SD (n=3 donors).

(C) Immunoblot analysis using whole-cell lysates from primary erythroblasts with indicated sgRNAs on day 15 of differentiation.

(D) Representative HPLC analysis of cells with indicated sgRNAs on day 15 of differentiation. HbA: hemoglobin A (adult form); HbF: fetal hemoglobin. HbF peak area is showed as percent of total HbF+HbA.

(E)  $\gamma$ -globin mRNA measured by RT-qPCR in primary erythroblasts on day 12 of differentiation; data are plotted as percentage of  $\gamma$ -globin over  $\gamma$ -globin+  $\beta$ -globin levels. Results are shown as mean  $\pm$  SD (n=3 donors).

(F) Schematic of experimental design.

(G-I) Summary of HbF flow cytometric analyses (G), HPLC analysis (H) and  $\gamma$ -globin mRNA measured by RT-qPCR (I) in human CD235a<sup>+</sup> erythroblasts isolated from recipient bone marrows. Each dot represents a single recipient mouse. n=3 mice per sgRNA.

**Figure 3**

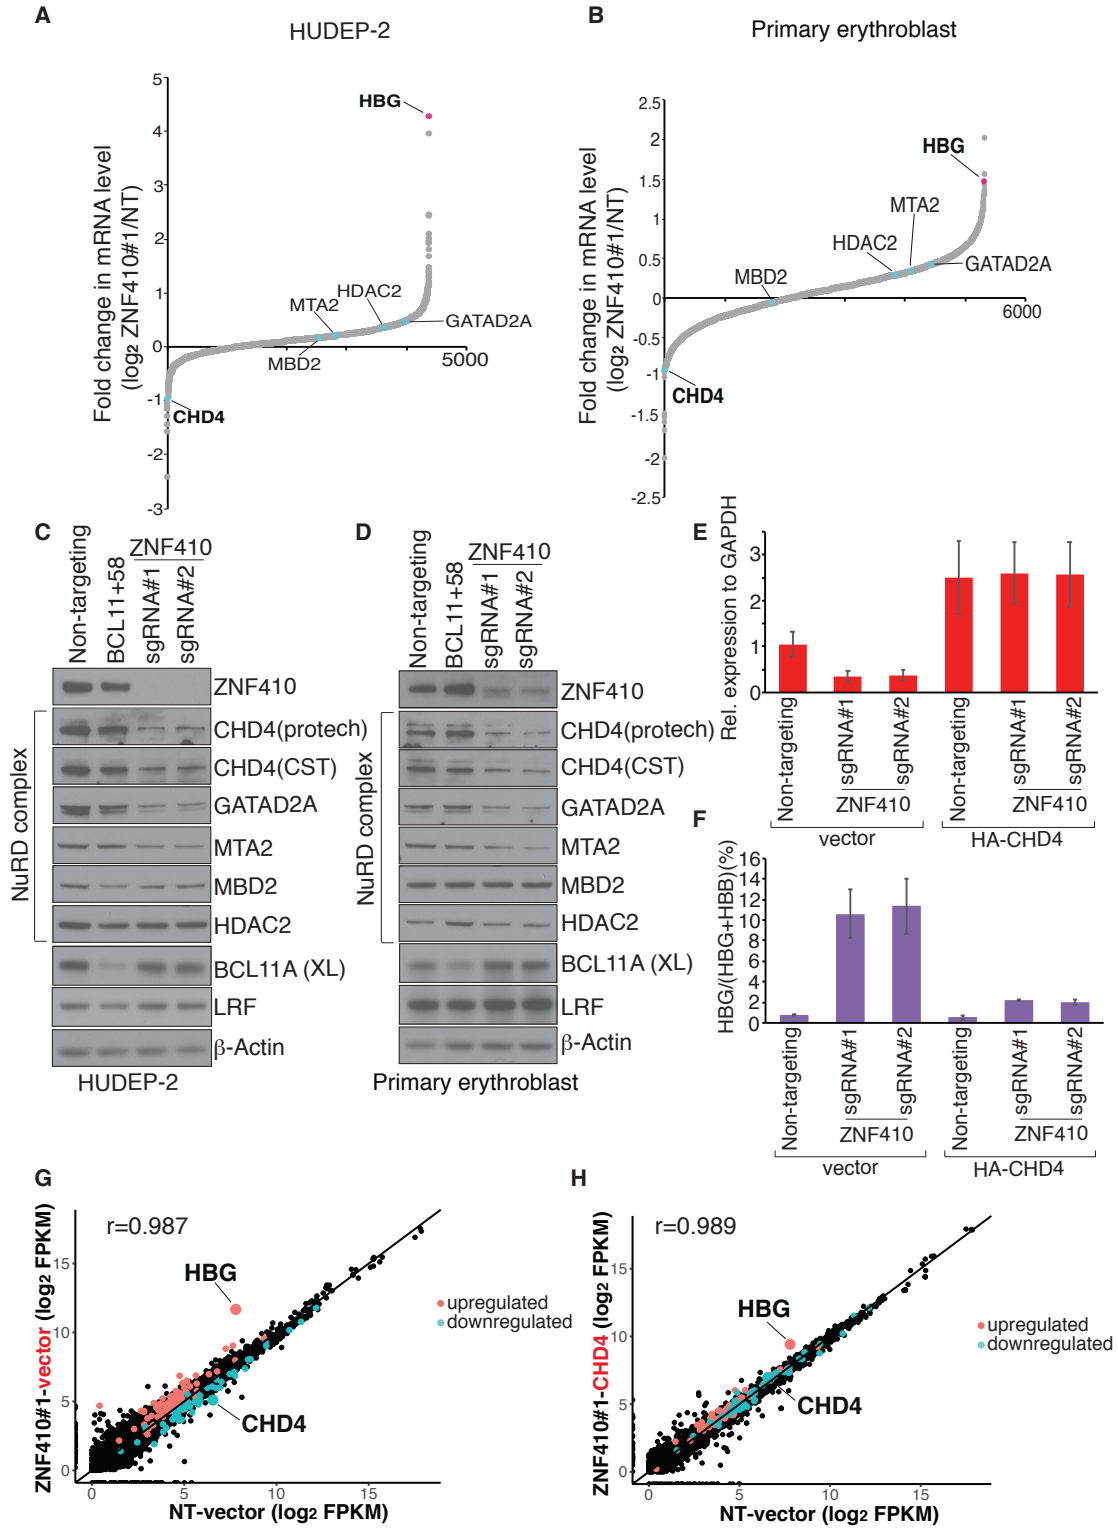

### Figure 3. CHD4 mediates $\gamma$ -globin repression by ZNF410

(A) RNA-seq analysis of HUDEP-2 cells transduced with ZNF410 sgRNA#1. Infected cells were sorted and differentiated for 7 days. Plotted is the average fold-change in mRNA levels of two biological replicates. Genes encoding NuRD complex subunits and  $\gamma$ -globin (HBG) are indicated. Fragments per kilobase of transcript per million (FPKM) mapped reads were used to calculate fold change. NT: non-targeting.

(B) RNA-seq analysis of primary erythroblasts with ZNF410 depletion by sgRNA#1. Cells were differentiated for 12 days. Plotted is the average fold-change in mRNA levels of two independent donors.

(C-D) Immunoblot analysis using whole-cell lysates from differentiated HUDEP-2 cells (C) and primary erythroblasts on day 15 of differentiation (D). BCL11A(XL) is the functional BCL11A isoform. CHD4 antibodies were from Proteintech and Cell Signaling Technologies (CST).

(E) CHD4 mRNA levels measured by RT-qPCR in ZNF410 deficient HUDEP-2 cells transduced with lentiviral vector containing CHD4 cDNA or empty vector. Results are shown as mean  $\pm$  SD (n=2). GAPDH was used for normalization.

(F)  $\gamma$ -globin levels measured by RT-qPCR in ZNF410 deficient HUDEP-2 cells transduced with lentiviral vector containing CHD4 cDNA or empty vector, data are plotted as percentage of  $\gamma$ -globin over  $\gamma$ -globin +  $\beta$ -globin levels. Results are shown as mean  $\pm$  SD (n=2).

(G) Scatter plot of RNA-seq analysis in ZNF410 deficient HUDEP-2 cells (by ZNF410 sgRNA#1) with empty vector. Cells with non-targeting sgRNA and vector serve as control. Each dot indicates a gene. Each gene is depicted according to averaged FPKM value from 2 biological replicates. r: Pearson's correlation coefficient. NT: non-targeting.

(H) Scatter plot of RNA-seq analysis in ZNF410 deficient HUDEP-2 cells (by ZNF410 sgRNA#1) with re-introduction of CHD4 cDNA. Each gene is depicted according to averaged FPKM value from 2 biological replicates. r: Pearson's correlation coefficient.

Figure 4

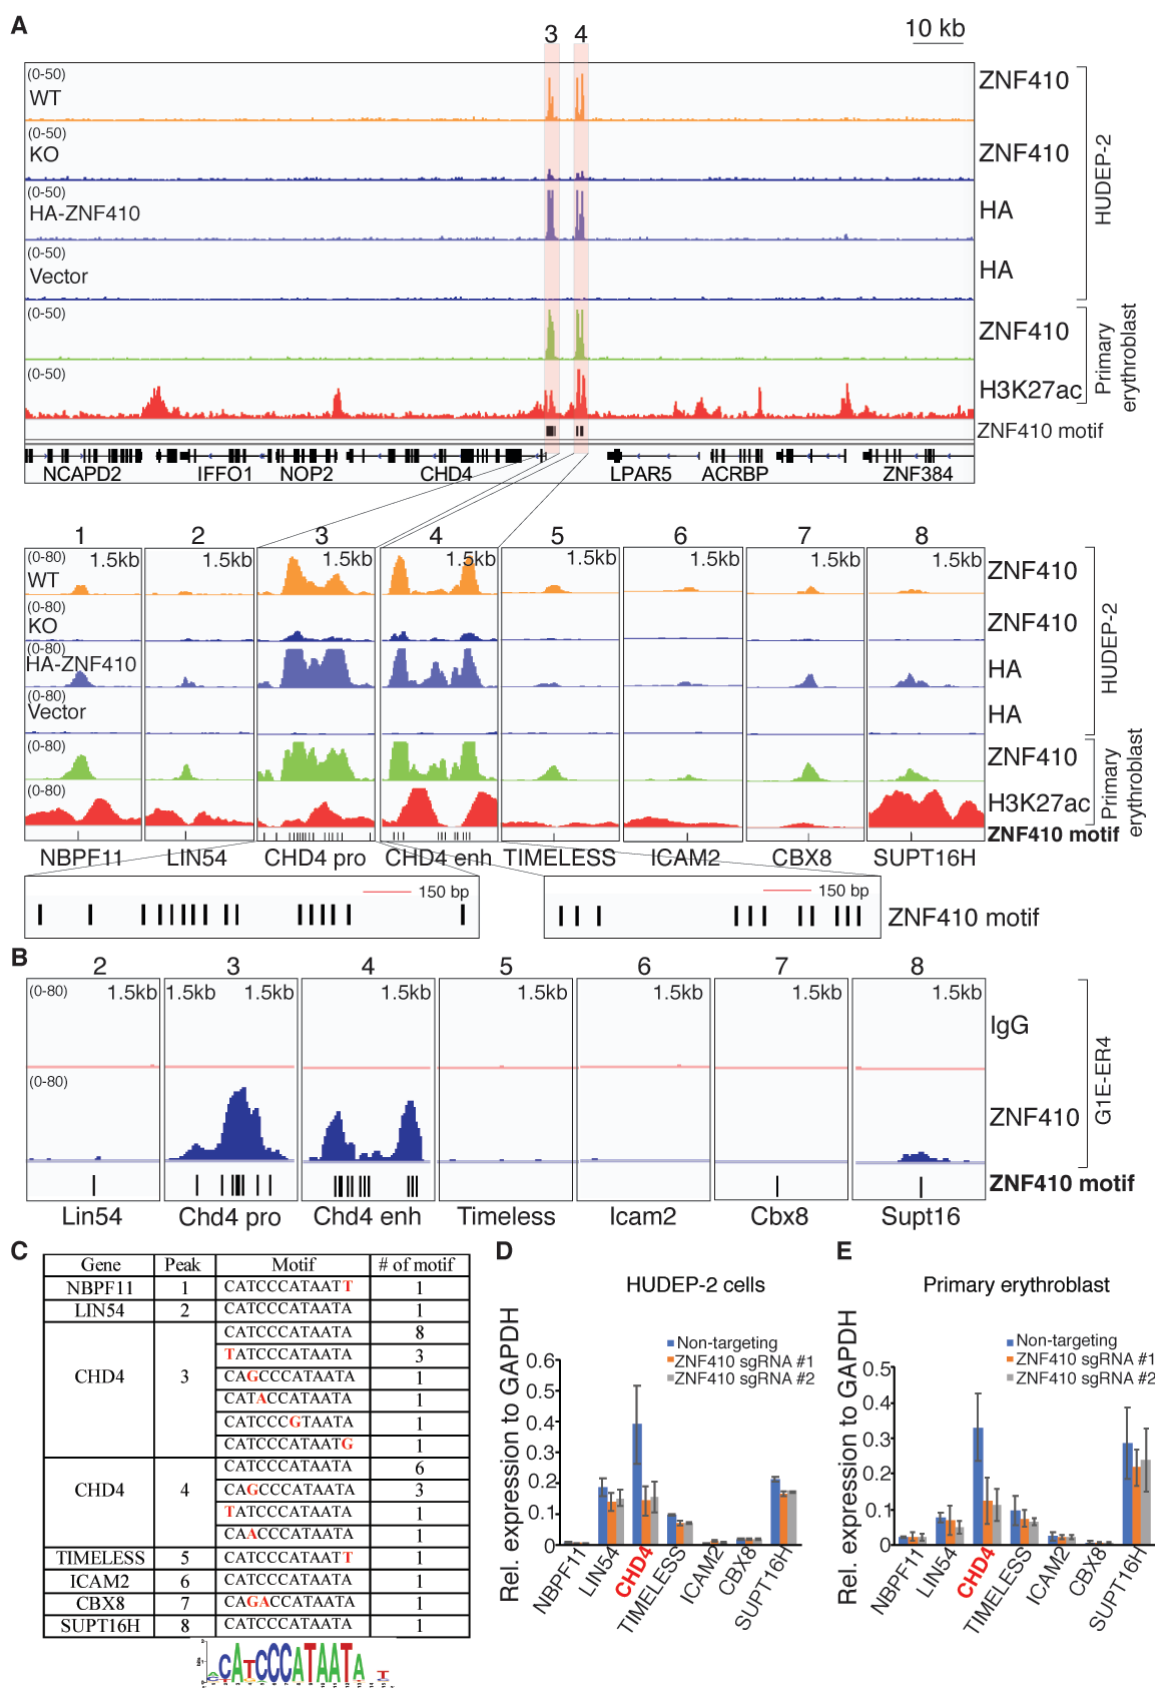

#### **Figure 4. ZNF410 binding to the CHD4 locus occurs at highly conserved motif clusters**

(A)ChIP-seq profiles of endogenous ZNF410, HA-ZNF410 and H3K27ac. CHD4 promoter and enhancer are highlighted in orange. ZNF410 binding motifs are denoted by vertical black lines at the bottom. The 8 peak-associated genes are shown below the tracks. ZNF410 KO cells and cells transduced with empty vector serve as negative controls. HA-ZNF410: N-terminal HA tagged ZNF410. HA: hemagglutinin.

(B)Browser tracks of endogenous ZNF410 ChIP-seq occupancy at the 7 murine counterparts in differentiated mouse erythroid cells. ZNF410 binding motifs are showed at the bottom. IgG track serve as negative control.

(C)Summary of ZNF410 binding motif counts at the 8 peaks, and derived de novo motif logo in the human genome. Red font indicates the sequence variants.

(D-E) mRNA levels of the 7 ZNF410 bound genes in HUDEP-2 cells transduced with indicated sgRNAs (D) and primary erythroblasts electroporated with indicated sgRNAs (E) by RT-qPCR (n=2). GAPDH was used for normalization.

**Figure 5**

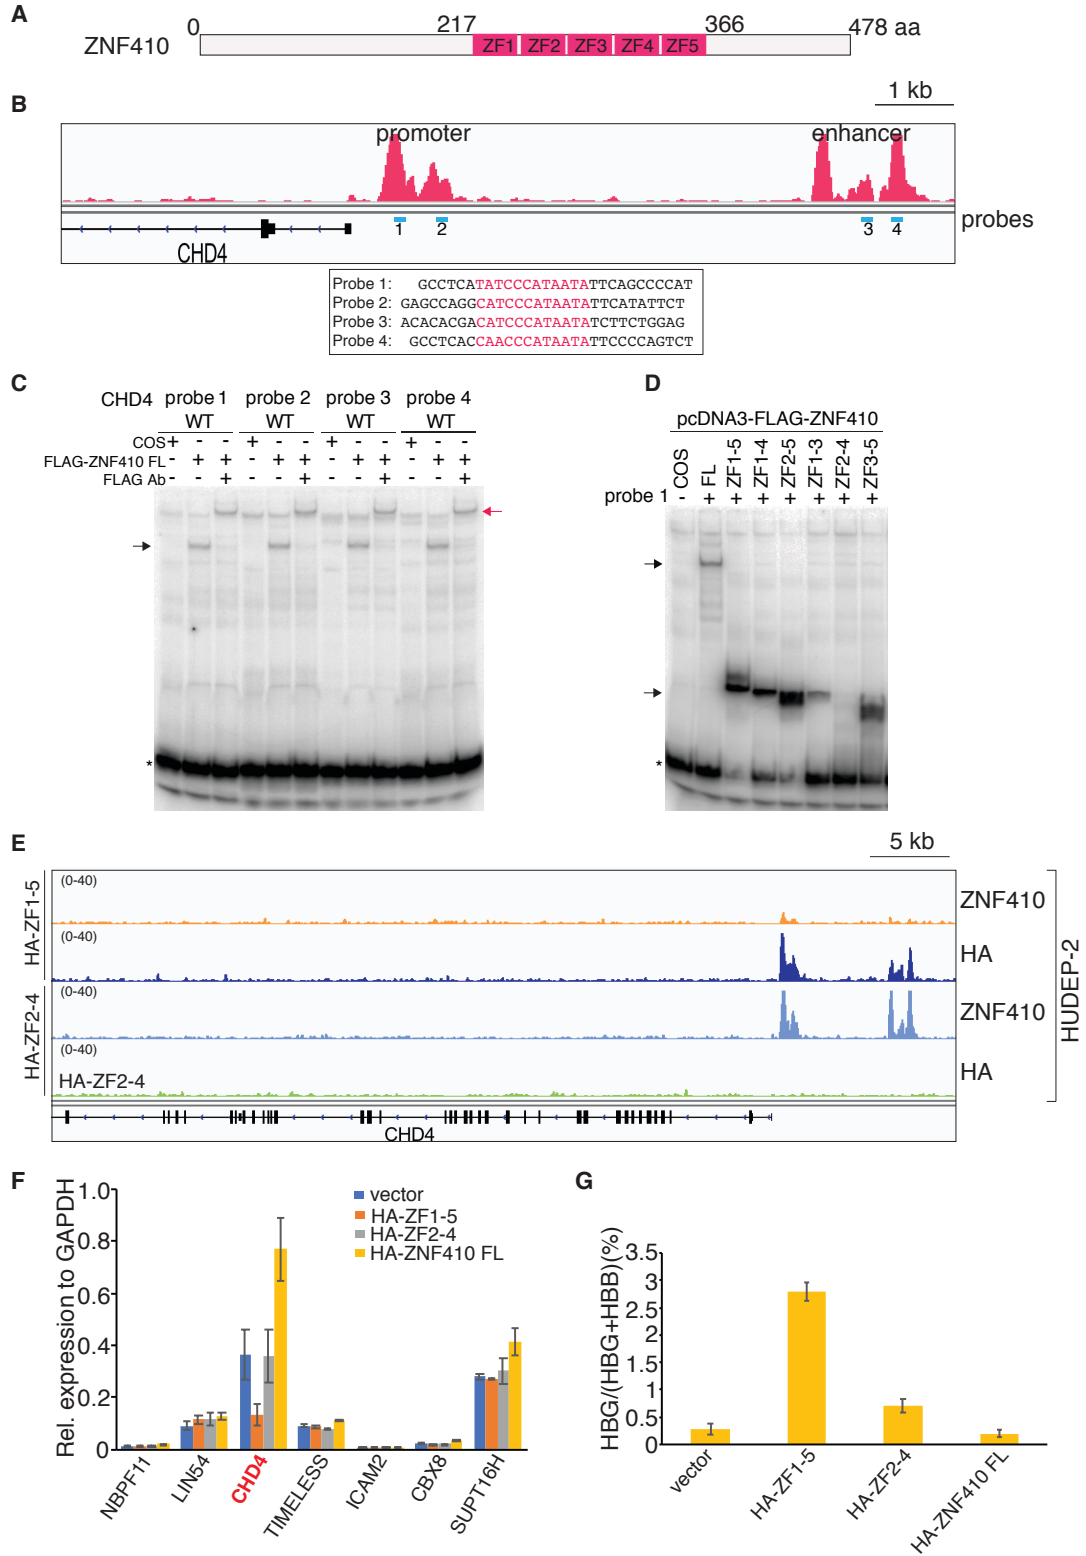

## Figure 5. The ZF domain of ZNF410 is sufficient for DNA binding in vitro and in vivo

(A) Schematic of human ZNF410. ZNF410 contains 478 amino acids, with five C2H2-type zinc fingers (ZF) between amino acids 217 and 366.

(B) ZNF410 ChIP-seq track with EMSA probes shown in blue underneath the peaks and probe sequences showed below. Motifs are highlighted in red.

(C) Full-length ZNF410 binds to the four motifs from the CHD4 promoter and enhancer sites. Black arrow: ZNF410-probe complex; red arrow: FLAG antibody-ZNF410-probe complex. \*: free probes. Ab: antibody, FL: full length. FLAG-ZNF410: N-terminal FLAG tagged ZNF410.

(D) The ZF domain of ZNF410 and its truncations bind to the motif except ZF2-4. Black arrow: ZNF410 FL, ZF domain or domain truncation-probe complex. \*: free probes.

(E) Browser track of endogenous ZNF410, HA ChIP-seq occupancy at the CHD4 locus in HUDEP-2 cells overexpressing HA-ZF1-5 or HA-ZF2-4. HA: hemagglutinin.

(F) mRNA levels of the 7 ZNF410 bound genes by RT-qPCR in differentiated HUDEP-2 cells with HA-ZF1-5, HA-ZF2-4 or HA-ZF410 FL overexpression. Results are shown as mean  $\pm$  SD (n=2). GAPDH was used for normalization. FL: full length.

(G)  $\gamma$ -globin levels measured by RT-qPCR in differentiated HUDEP-2 cells with HA-ZF1-5, HA-ZF2-4 or HA-ZF410 FL overexpression. Data are plotted as percentage of  $\gamma$ -globin over  $\gamma$ -globin+  $\beta$ -globin levels. Results are shown as mean  $\pm$  SD (n=2).



Figure 6

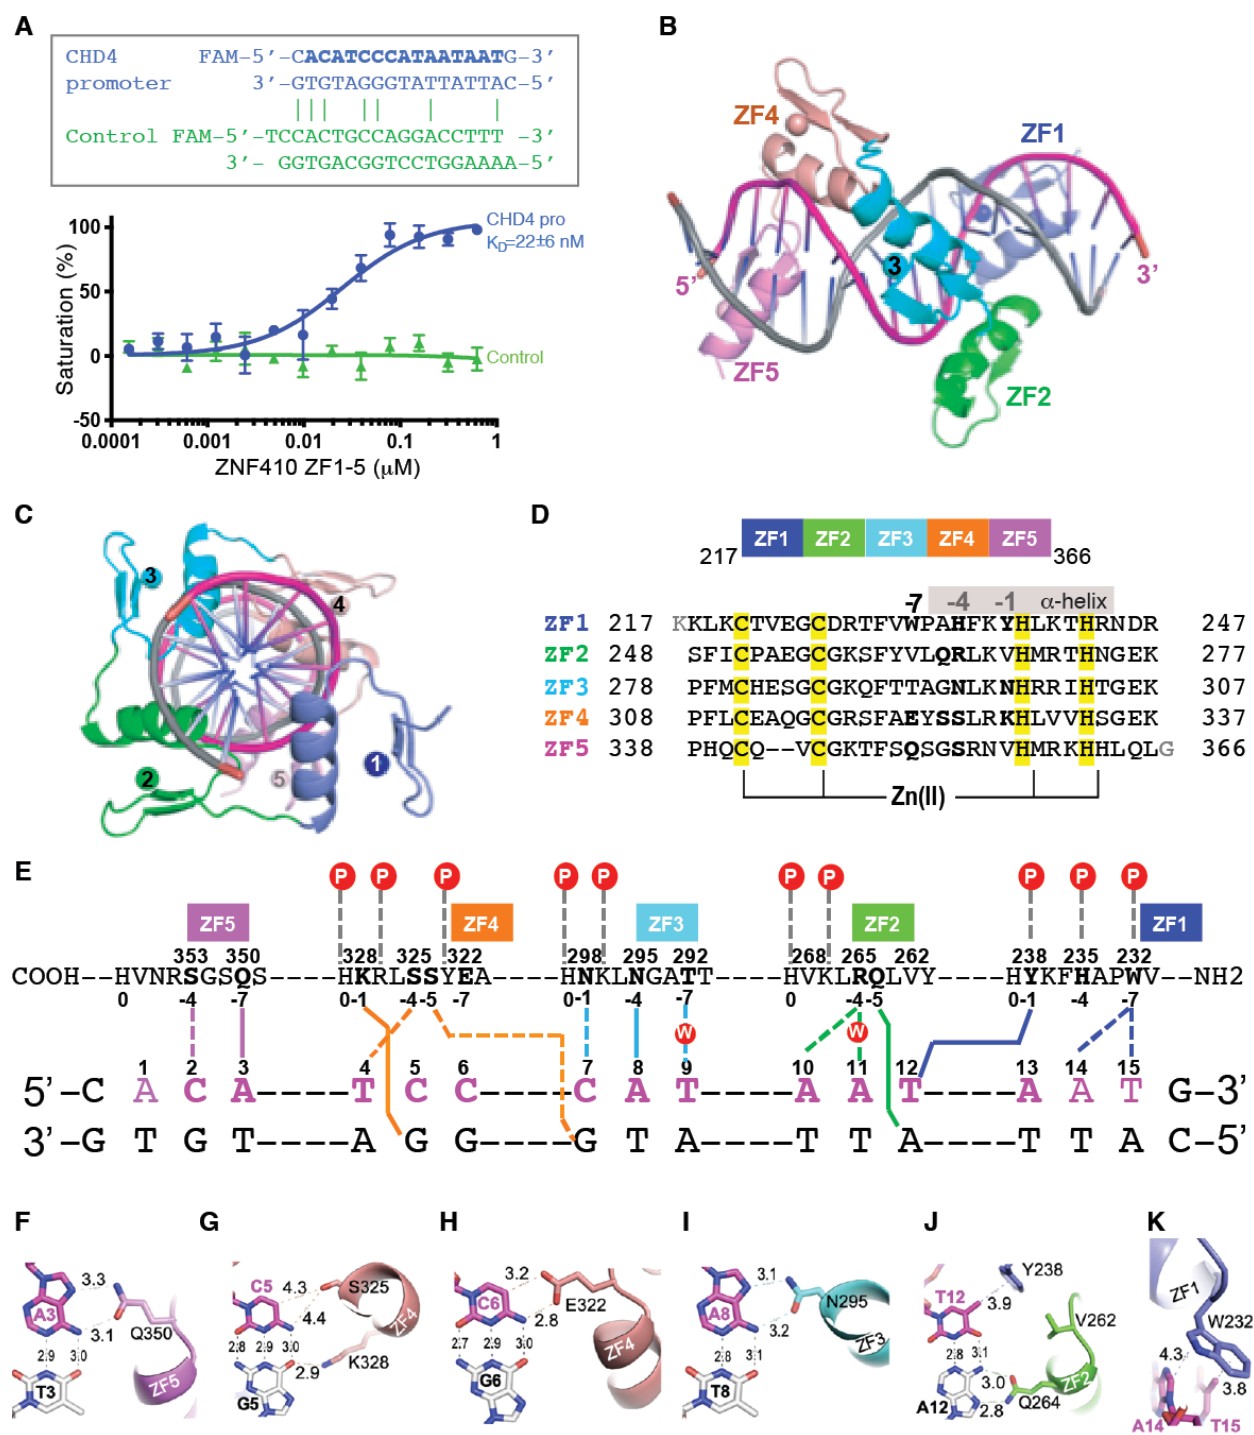

## Figure 6. Structural basis of ZNF410-DNA binding

(A) Binding affinity measurements of the ZF domain against oligos by fluorescence polarization assays. Above: oligos used. X-axis: concentration of purified GST-ZF1-5 protein, Y-axis: percentage of saturation. Pro: promoter.

(B-C) Two ortholog views of a ZNF410 ZF1-5 binding to DNA.

(D) Sequence alignment of the five zinc fingers of ZNF410 with DNA base-interacting positions -1, -4 and -7 in bold. The Zn-coordinating residues C2H2 of each finger are highlighted in yellow.

(E) General scheme of interactions between ZF1-5 and DNA. The top line indicates amino acids of each finger from C to N terminus. The first zinc-coordination His in each finger is referenced as position 0, with residues before this, at sequence positions -1, -4 and -7, corresponding to the 5'-middle-3' of each DNA triplet element. The bottom two lines indicate the sequence of the double-strand oligonucleotide used for crystallization. The base pair matching the consensus sequence by are numbered as 1-15.

(F-K) Examples of base-specific contacts between each ZF and DNA. (F) Q350 of ZF5 interacts with A3. (G) S325 and K328 of ZF4 interacts with the C:G base pair at position 5. (H) E322 of ZF4 interacts with C6. (I) N295 of ZF3 interacts with A8. (J) Q264 of ZF2 and Y238 of ZF1 interact with the T:A base pair at position 12. (K) W232 of ZF1 interacts with A14 and T15.

## Supplemental Figures

**Figure S1**

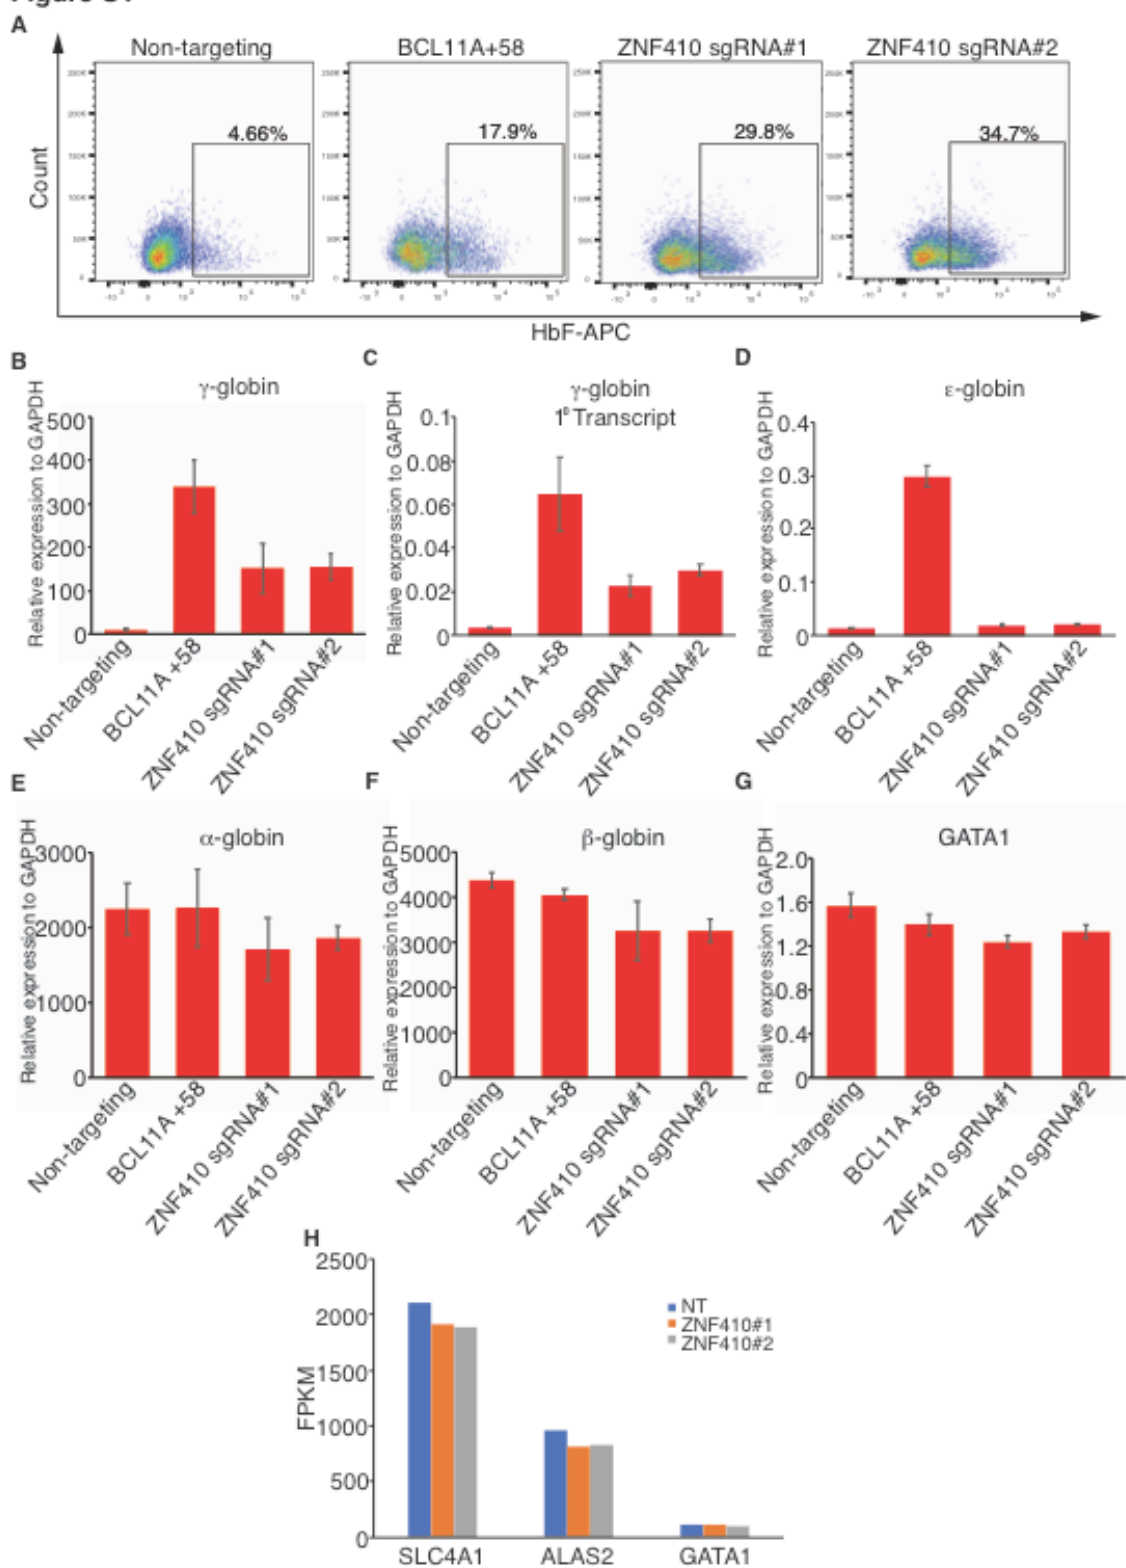

**Figure S1. HbF flow cytometric analysis and RT-qPCR in HUDEP-2 cells, related to Figure 1**

(A) Representative flow cytometric analysis of differentiated HUDEP-2 cells stained with anti-HbF antibody. Positive control: sgRNA against BCL11A +58: Negative control: Non-targeting sgRNA.

(B-G) mRNA levels of  $\gamma$ -globin,  $\gamma$ -globin primary transcripts,  $\epsilon$ -globin,  $\alpha$ -globin,  $\beta$ -globin and GATA1 by RT-qPCR. Results are shown as mean  $\pm$  SD (n=3). GAPDH was used for normalization. 1<sup>0</sup> transcript: primary transcript.

(H) Expression levels of SLC4A1(Band3), ALAS2 and GATA1 in differentiated HUDEP-2 cells transduced with indicated sgRNAs by RNA-seq analysis. NT: non-targeting.

**Figure S2**

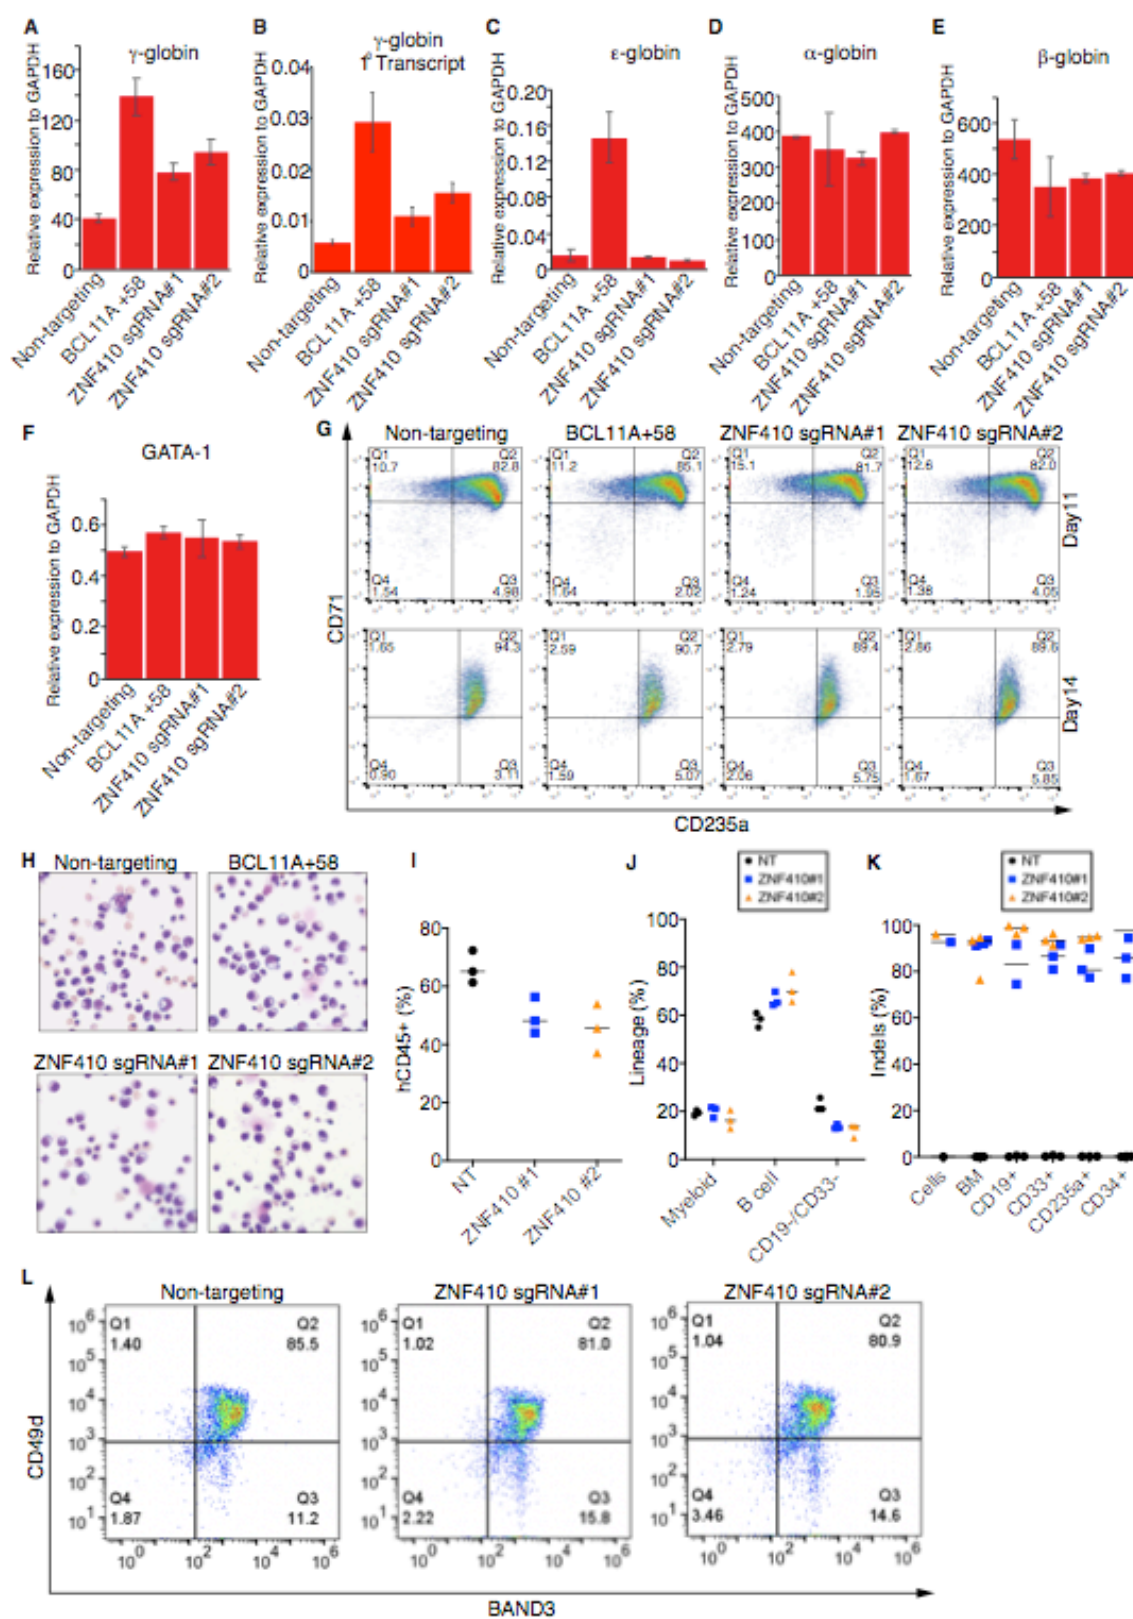

**Figure S2. ZNF410 depletion induces HbF with minimal impact on erythroid maturation in vitro and in vivo, related to Figure 2**

(A-F) mRNA levels of  $\gamma$ -globin,  $\gamma$ -globin primary transcripts,  $\epsilon$ -globin,  $\alpha$ -globin,  $\beta$ -globin and GATA1 by RT-qPCR in cultured primary human erythroblasts on day 12 of differentiation. Positive control: sgRNA against BCL11A +58: Negative control: Non-targeting sgRNA. Results are shown as mean  $\pm$  SD (n=3). GAPDH was used for normalization.

(G) Representative flow cytometric analysis of erythroid maturation markers CD71 and CD235a in cultured primary human erythroblasts on day 11 and day 14 of differentiation.

(H) Wright-Giemsa staining in cultured primary human erythroblasts at day 16 of differentiation.

(I) Normalized human chimerism in bone marrow from NBSGW mice at 16 weeks after transplantation, shown as percentage of human (h) CD45+ cells.

(J) Human myeloid (CD33+), B cells (CD19+) and other cell types (CD19-/CD33-) shown as percentages of the human CD45+ population in bone marrow (BM) from NBSGW mice at 16 weeks after transplantation.

(K) Indels measured by next generation sequencing (NGS) in input cells, bone marrows (BM) and specific hematopoietic lineages including B cells (CD19+), myeloid (CD33+), erythroblasts (CD235a+) and hematopoietic stem cells (CD34+).

(L) Representative flow cytometric analysis of erythroid maturation markers CD49d/Band3 in human CD235a+ erythroblasts from recipient mouse bone marrow. For (I-K) panels, each dot in graphs represents a separate mouse. n=3 mice per sgRNA. NT: non-targeting.

**Figure S3**

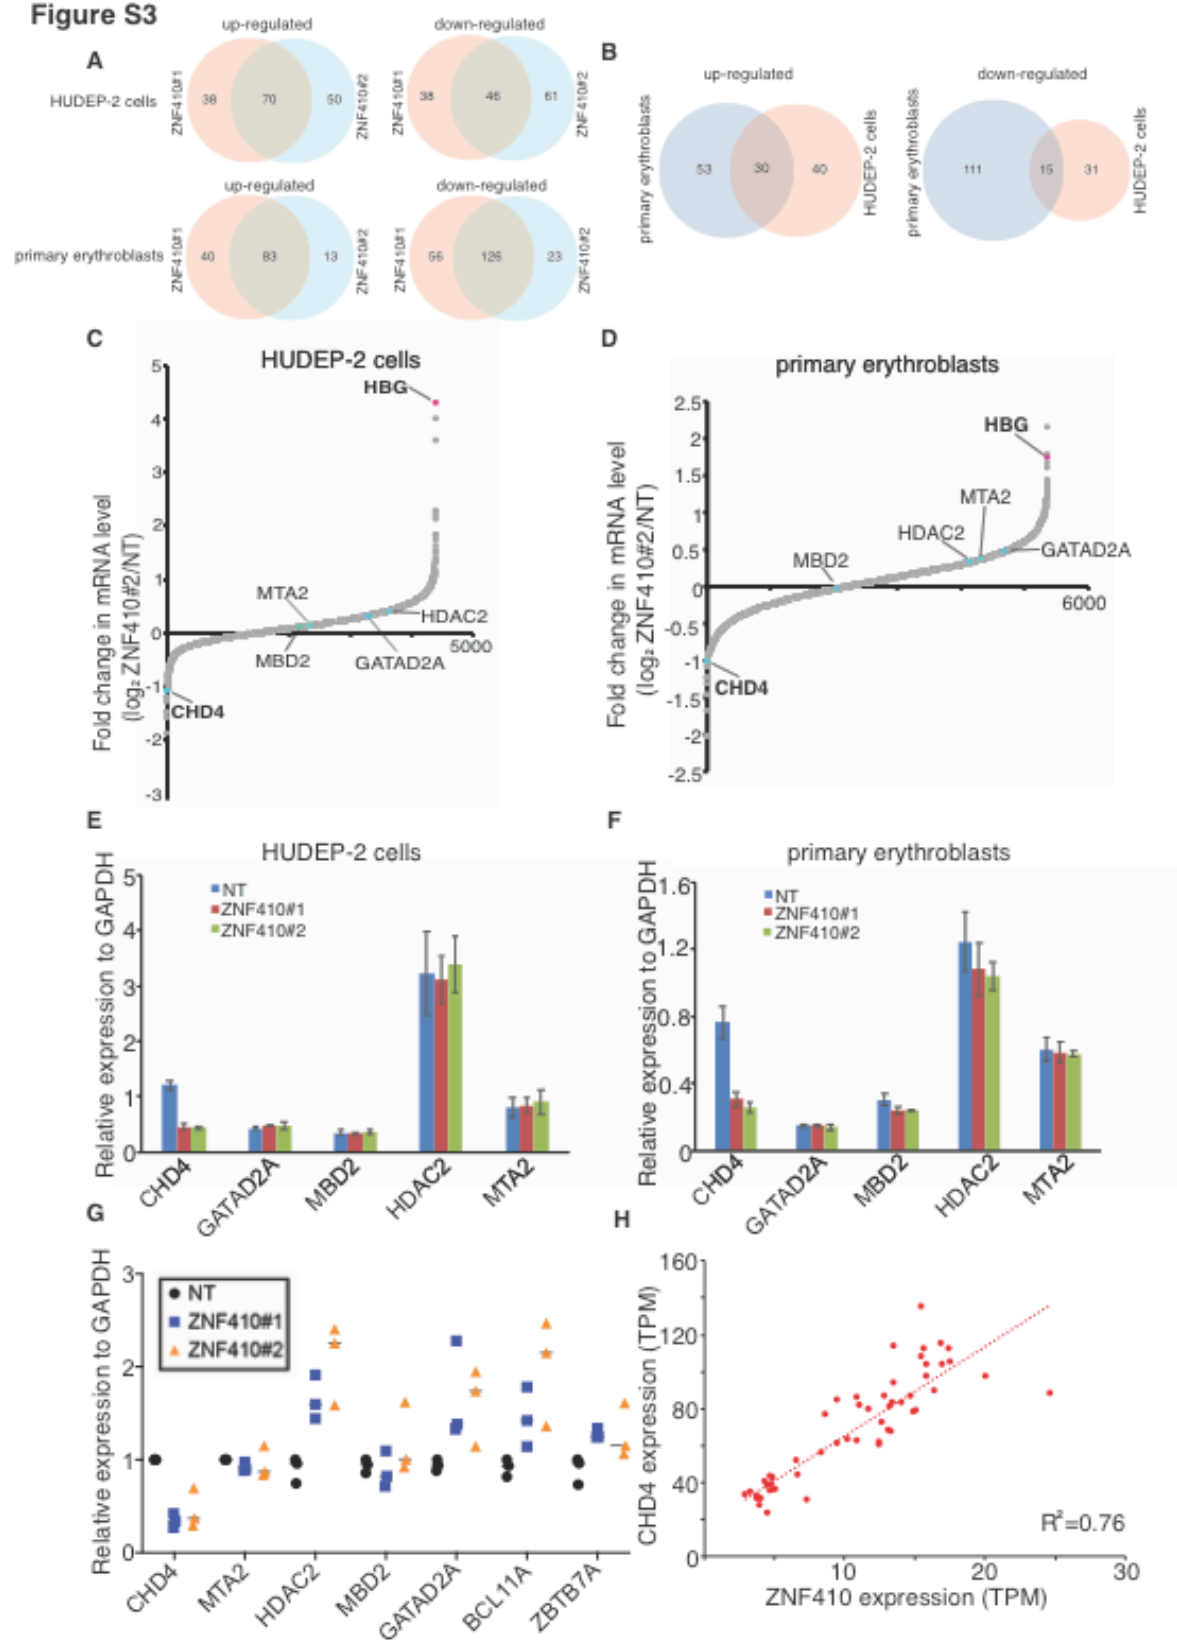

### Figure S3. ZNF410 depletion diminishes CHD4 transcription, related to Figure 3

(A) Venn diagrams of the commonly upregulated and downregulated genes in both ZNF410 sgRNAs in HUDEP-2 cells or primary erythroblasts.

(B) Venn diagrams of the commonly upregulated and downregulated genes in both HUDEP-2 and primary erythroblasts.

(C-D) RNA-seq analysis of HUDEP-2 cells transduced with ZNF410 sgRNA#2 and primary erythroblasts with ZNF410 sgRNA#2. Plotted is the average fold-change in mRNA levels of two biological replicates. FPKM value was used to calculate fold change for each gene. NuRD complex subunits and  $\gamma$ -globin genes are indicated. NT: non-targeting.

(E-F) mRNA levels of the NuRD complex subunits including CHD4, HDAC2, GATAD2A, MBD2 and MTA2 by RT-qPCR in HUDEP-2 cells and primary erythroblasts. Results are shown as mean  $\pm$  SD (n=2). GAPDH was used for normalization. NT: non-targeting.

(G) mRNA levels of the NuRD complex subunits and BCL11A and ZBTB7A by RT-qPCR in human CD235a<sup>+</sup> erythroblasts from recipient NBSGW mouse bone marrow. Each dot in graph represents a separate mouse. n=3 mice per sgRNA. GAPDH was used for normalization. NT: non-targeting.

(H) Correlation of ZNF410 and CHD4 mRNA levels across 53 human tissues. TPM: transcripts per kilobase million. Each dot indicates one tissue. Expression data were obtained from the Genotype-Tissue Expression database.



**Figure S4**

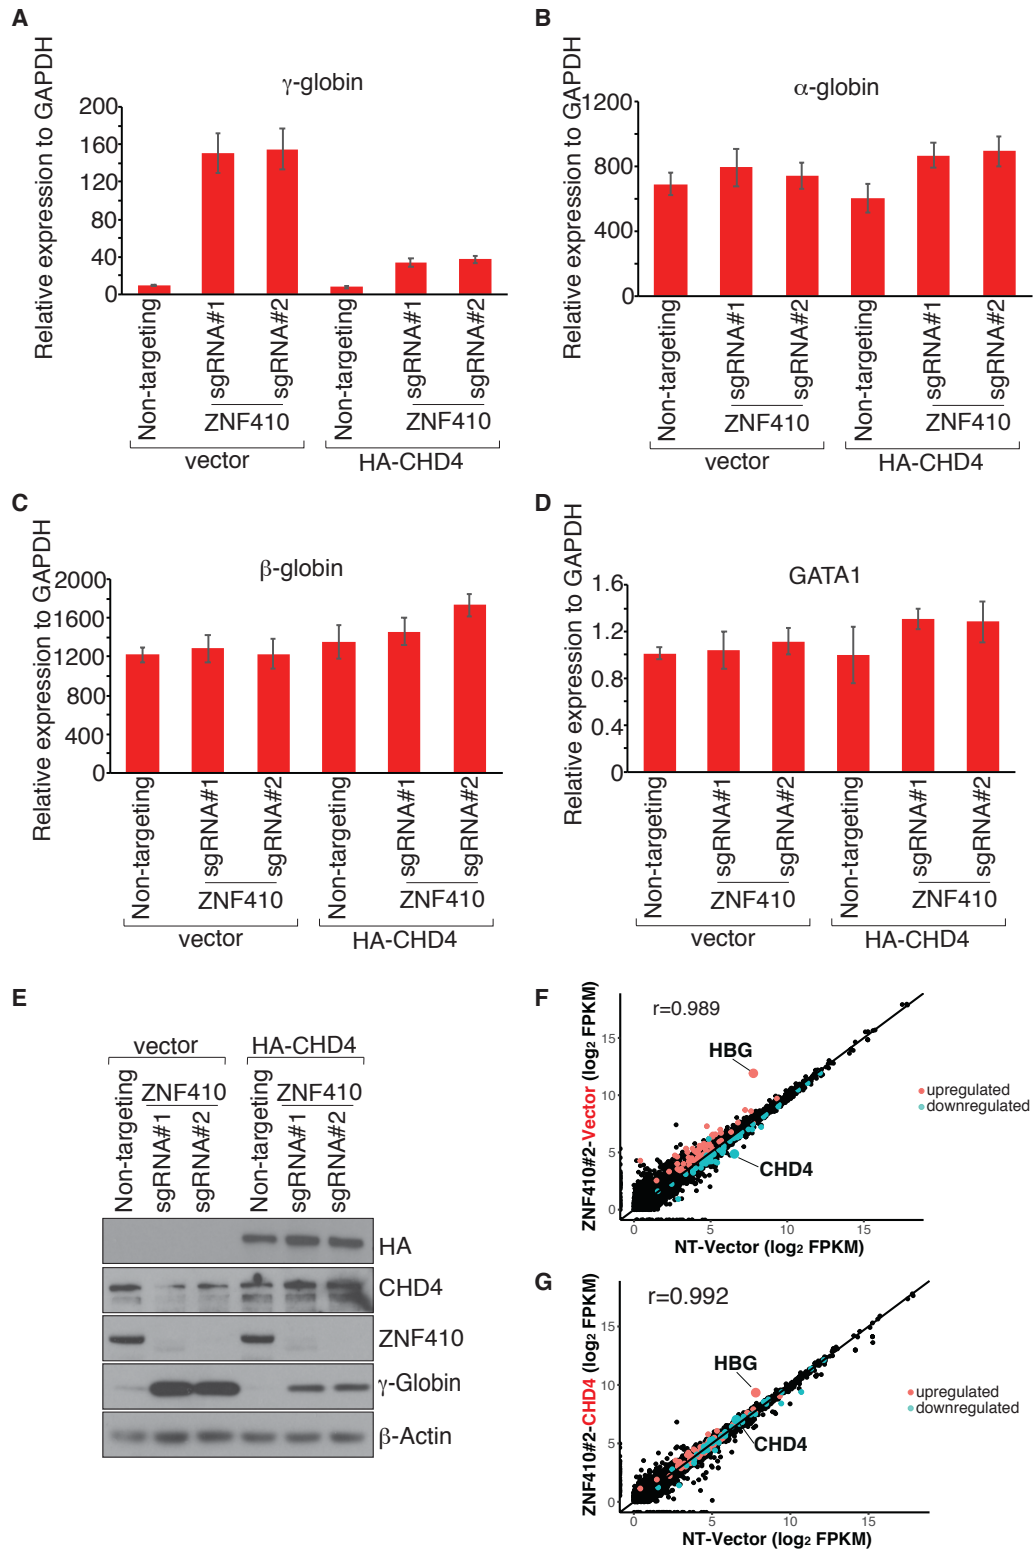

**Figure S4. Re-introduction of CHD4 cDNA restores the silencing of HbF and transcriptome in ZNF410 deficient HUDEP-2 cells, related to Figure 3**

(A-D) mRNA levels of  $\gamma$ -globin,  $\alpha$ -globin,  $\beta$ -globin and GATA1 by RT-qPCR in ZNF410 deficient HUDEP-2 cells transduced with lentiviral vector containing CHD4 cDNA or empty vector. Results are shown as mean  $\pm$  SD (n=2). GAPDH was used for normalization.

(E) Western blot using whole-cell lysates from ZNF410 deficient HUDEP-2 cells with empty vector or forced CHD4 expression. HA-CHD4: N-terminal HA tagged CHD4.

(F) Scatter plot of RNA-seq analysis in ZNF410 deficient HUDEP-2 cells (by ZNF410 sgRNA#2) with empty vector. Each gene is depicted according to averaged FPKM value from 2 biological replicates. r: Pearson's correlation coefficient. NT: non-targeting.

(G) Scatter plot of RNA-seq analysis in ZNF410 deficient HUDEP-2 cells (by ZNF410 sgRNA#2) with re-introduction of CHD4 cDNA. Each gene is depicted according to averaged FPKM value from 2 biological replicates. r: Pearson's correlation coefficient. NT: non-targeting.

Figure S5

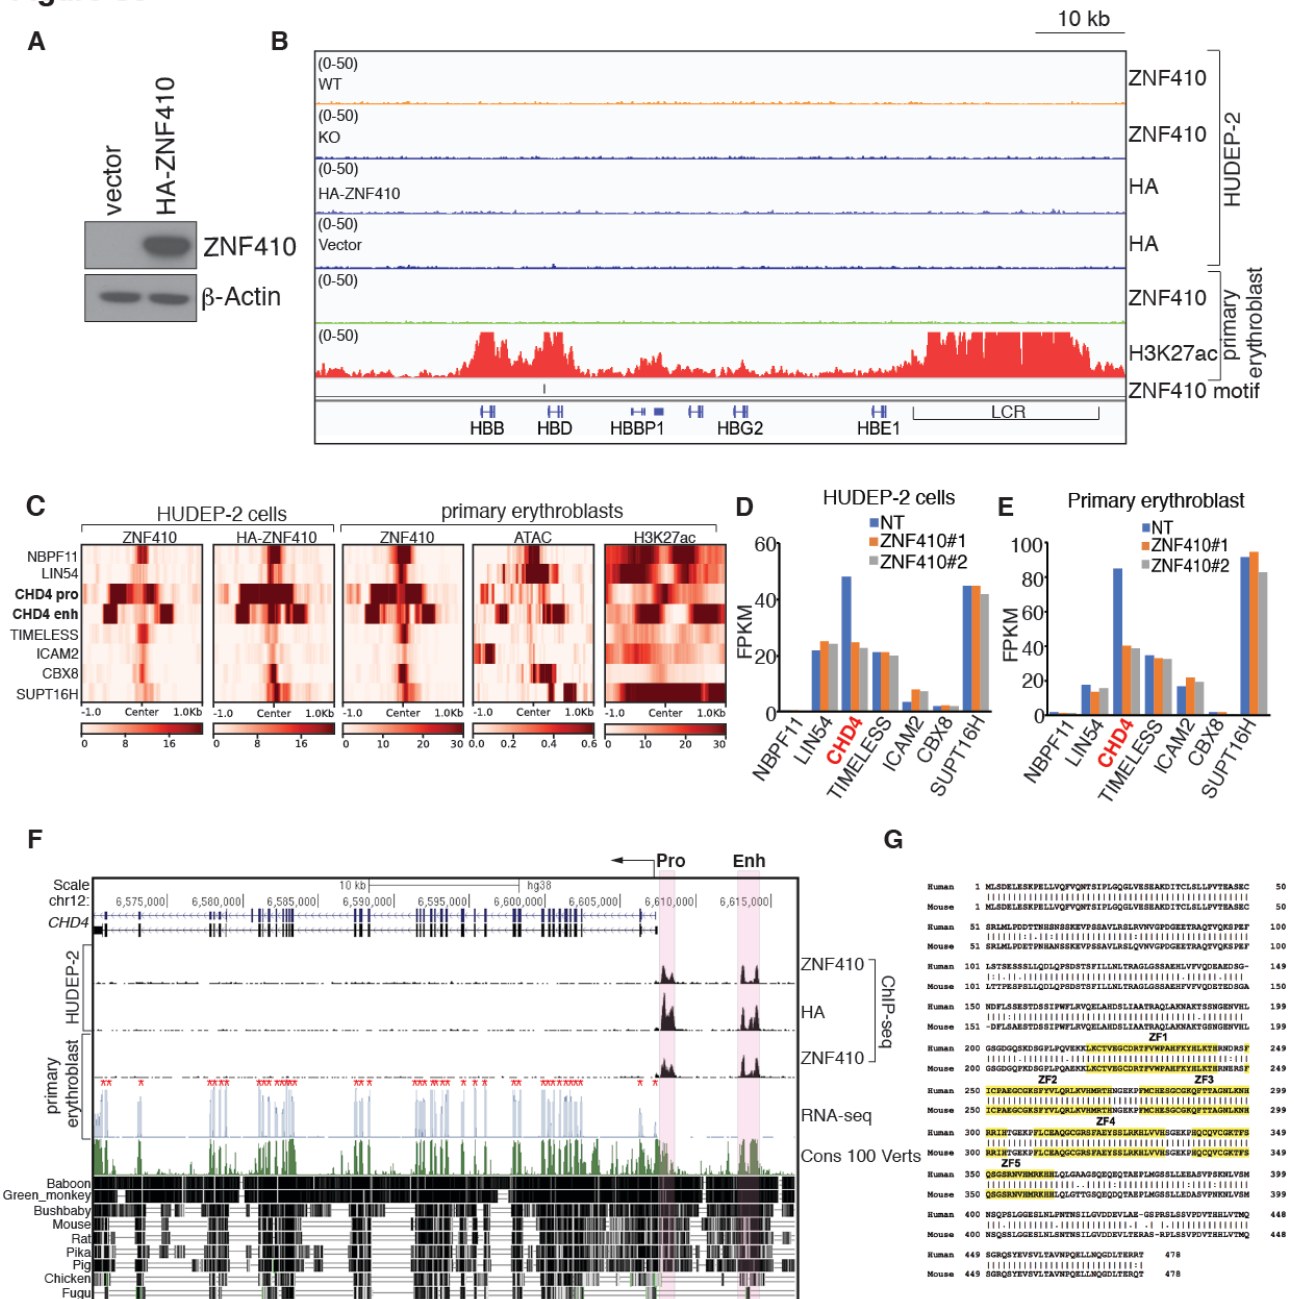

**Figure S5. ZNF410 binds to the CHD4 locus in an evolutionarily conserved manner, related Figure 4**

(A) Immunoblot analysis confirming overexpression of HA-ZNF410 in HUDEP-2 cells.

(B) Gene track of endogenous ZNF410, HA-ZNF410 and H3K27ac ChIP-seq occupancy at the  $\beta$ -globin locus. The enhancer (LCR) is highlighted with line. LCR: local control region.

(C) Heatmaps of the signal intensities of the 8 ZNF410 bound regions from endogenous ZNF410, HA-ZNF410, H3K27ac ChIP-seq and ATAC-seq in HUDEP-2 or primary erythroblasts. ATAC-seq were obtained from published data (Ludwig et al., 2019).

(D-E) Expression levels of the 7 ZNF410 bound genes in HUDEP-2 cells transduced with indicated sgRNAs (F) and primary erythroblasts with indicated sgRNAs (G) by RNA-seq analysis. NT: non-targeting.

(F) PhastCons (from 0 to 1) estimates of evolutionary conservation among 100 vertebrates at the CHD4 gene locus. The CHD4 promoter and enhancer are shaded in orange. CHD4 exons are marked by red \* in RNA-seq track. ZNF410 ChIP-seq tracks show ZNF410 binding at the CHD4 promoter and enhancer. Pro: promoter, Enh: enhancer. Cons: conservation, Verts: vertebrates.

(G) Alignment of human and mouse ZNF410 protein sequence. Identical residues are linked by vertical line. ZF (zinc finger) residues are shaded in yellow.

**Figure S6**

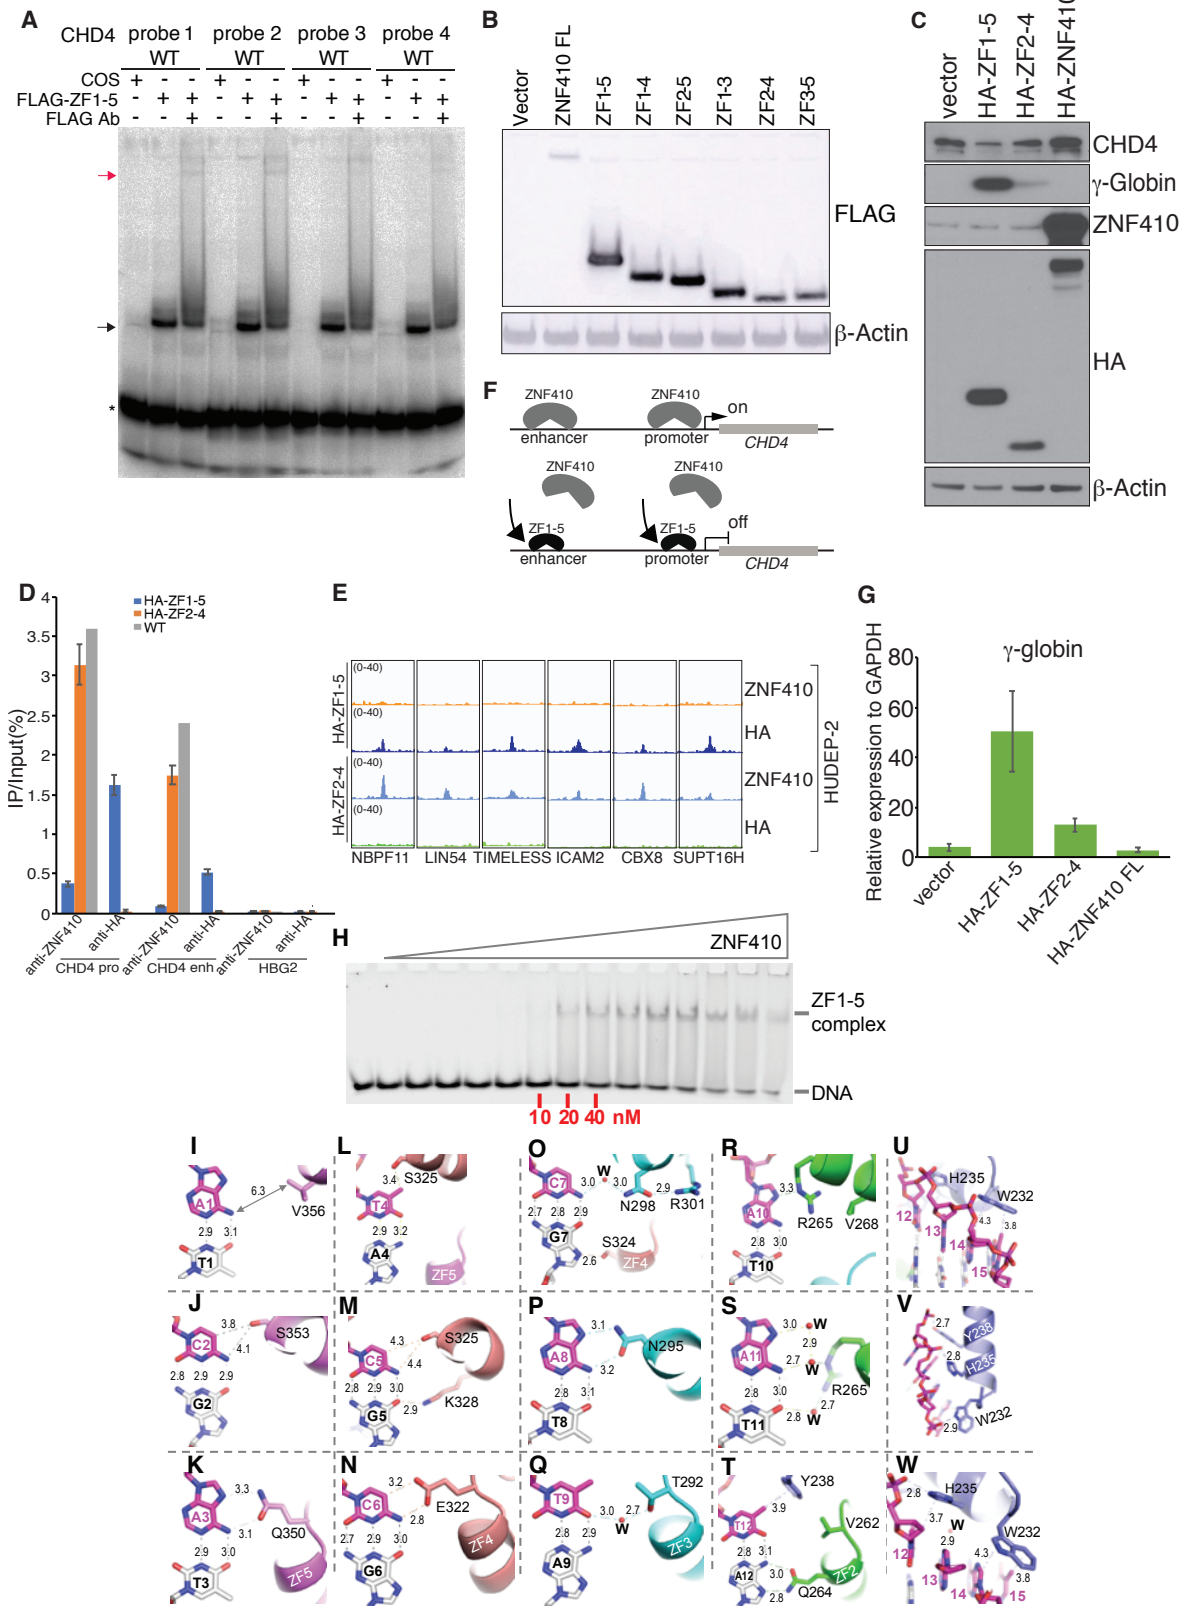

## **Figure S6. The ZF domain of ZNF410 is sufficient for DNA binding in vitro and in vivo, related to Figure 5 and Figure 6**

(A) The ZF domain of ZNF410 binds to the four motifs from the CHD4 promoter and enhancer sites. Ab, antibody. Black arrow: ZF domain-probe complex; red arrow: FLAG antibody-ZF domain-probe complex. \* : free probes.

(B) Western blot analysis of FLAG-ZNF410 constructs expressed in COS-7 cells. Control: empty vector. All constructs were N-terminal FLAG tagged.

(C) Western blot analysis using whole-cell lysates from differentiated HUDEP-2 cells overexpressing HA-ZF1-5, HA-ZF2-4 or HA-ZNF410 FL.

(D) ZNF410 and HA ChIP-qPCR in WT HUDEP-2 cells, HA-ZF1-5 or HA-ZF2-4 overexpressed HUDEP-2 cells. HBG2 region serves as negative control. Results are shown as mean  $\pm$  SD (n=2 for HA-ZF1-5 and HA-2-4 overexpressed cells)

(E) ChIP-seq tracks of endogenous ZNF410, HA-ZNF410 at the 6 ZNF410 bound regions in HUDEP-2 cells overexpressing indicated constructs.

(F) Diagram of HA-ZF1-5 displacing endogenous ZNF410 binding.

(G)  $\gamma$ -globin levels measured by RT-qPCR in differentiated HUDEP-2 cells overexpressing indicated constructs. Empty vector serves as control. Results are shown as mean  $\pm$  SD (n=2). GAPDH was used for normalization.

(H) EMSA of ZNF410 ZF1-5. The maximum protein concentration used were 0.5  $\mu$ M (the right most lane) followed by 2-fold serial dilutions.

(I-K) ZF5 interactions with base pairs 1-3. V356 is too far from A1 to make direct contact. S353 makes van der Waals contacts with C2. Q350 interacts with A3.

(L-N) ZF4 interactions with base pairs 4-6. S325 forms a weak hydrogen bond with T4, and makes van der Waals contact with C5. E322 interacts with C6.

(O-Q) ZF3 interactions with base pairs 7-9. N298 conducts a water mediated interaction with C7. S324 interacts with G7. N295 interacts with A8. T292 conducts a water mediated interaction with T9.

(R-T) ZF2 DNA interaction with base pairs 10-12. R265 forms a weak hydrogen bond with A10 and mediates a water network connecting with A:T base pair at position 11. Q264 interacts with A12. Y238 of ZF1 forms a  $\pi$ -methyl interaction with T12.

(U-W) ZF1 interactions with base pair 12-15. W232 forms van der Waals contact with A14 and T15. H235, Y238 and W232 form polar interactions with DNA backbone phosphate groups.

## Supplementary Text

ZF2 and ZF3 have water-mediated contacts via R265 of ZF2 and T292 and N298 of ZF3 (Figures S6O, S6Q and S6S). We note that Arg is the most common mechanism for Gua recognition and Asn for Ade recognition (as shown above) (Luscombe et al., 2001; Patel et al., 2016b; Patel et al., 2018). When N298 of ZF3 meets C:G at position 7 and R265 of ZF2 meets A:T at position 11, both side chains of N298 and R265 moves away from DNA bases and allow water molecules to diffuse in. N298 forms a H-bond with R301 (Figure S6O), whereas R265 rotates its side-chain guanidine group bridging between two neighboring A10 and A11 (Figures S6R and S6S). Similarly, histidine is the next favorable residue for Gua recognition, when H235 of ZF1 meets an A:T base pair at position 14, H235 simply rotates its side chain imidazole ring and forms charge-charge interaction with a backbone phosphate group (Figure S6V). The smaller serine residues of ZF4 and ZF5 have non-specific contacts with C2 (via S353 of ZF5), T4 and C5 (via S325 of ZF4), and G7 (via S324 of ZF4) (Figures S6J, S6L, S6M and S6O), because serine can act as both an H-bond donor and acceptor and might accommodate alternative bases (Patel et al., 2017).

## Supplemental tables: Table S1. Primers for RT-qPCR

| Name              | Sequence 5'-3'           |
|-------------------|--------------------------|
| Gamma_globin_F    | TGGCAAGAAGGTGCTGACTTC    |
| Gamma_globin_R    | GCAAAGGTGCCCTTGAGATC     |
| Beta_globin_F     | TGGGCAACCCTAAGGTGAAG     |
| Beta_globin_R     | GTGAGCCAGGCCATCACTAAA    |
| Alpha_globin_F    | AAGACCTACTTCCCGCACTTC    |
| Alpha_globin_R    | GTTGGGCATGTCGTCCAC       |
| Gamma_globin_PT_F | TTTGTGGCACCTTCTGACTG     |
| Gamma_globin_PT_R | GCCAAAGCTGTCAAAGAA       |
| MBD2_F            | AAGTGCTGGCAAGAGCGATGTCTA |
| MBD2_R            | TTTCCCAGGTACCTTGCCAACTGA |
| GAPDH_F           | AGCCACATCGCTCAGACAC      |
| GAPDH_R           | GCCCAATACGACCAAATCC      |
| CHD4_F            | GCTGCAACCATCCATACCTC     |
| CHD4_R            | ACCATCGATGCGTTCGTATT     |
| GATA1_F           | CTGTCCCCAATAGTGCTTATGG   |
| GATA1_R           | GAATAGGCTGCTGAATTGAGGG   |
| MTA2_F            | TTCCCACCTACACTAAGCC      |
| MTA2_R            | AGGCCCTTCTGAAATCCAG      |
| BCL11A_F          | ACAAACGGAAACAATGCAATGG   |
| BCL11A_R          | TTTCATCTCGATTGGTGAAGGG   |
| HDAC2_F           | CATGGTGATGGTGTGAAGAAG    |
| HDAC2_R           | TCATTGGAAAATTGACAGCATAGT |
| GATAD2A_F         | ACGAGTTCATCTACCTGGTCGG   |
| GATAD2A_R         | ACGTGAAGTCCGTCTTGCACTG   |
| NBPF11_F          | GCATGGCTGTTGACATAGGCAG   |
| NBPF11_R          | CTATCCAGTGAGTCCTGCAAGAC  |
| LIN54_F           | GTCCGACTTGTTACTGCCACATC  |
| LIN54_R           | TTGGAAGTACATCCGCACTGG    |
| TIMELESS_F        | AAGTGGTCCAGGTGTCGGAGAA   |
| TIMELESS_R        | GTGGGCACTATTCTGCTGGTAG   |
| ICAM2_F           | ATGACACGGTCCTCCAATGCCA   |
| ICAM2_R           | GCACTCAATGGTGAAGGACTTGC  |
| CBX8_F            | AACATCCTGGATGCTCGCTTGC   |
| CBX8_R            | TTTGAGGAGGAAGGTTTTGGGCT  |
| SUPT16H_F         | CATTGGTGACACAGTGCTTGTGG  |
| SUPT16H_R         | CCAAAAGGTCCTCTGCCTCATC   |



**Table S2. sgRNA sequences**

| Name                | Sequence 5'-3'       |
|---------------------|----------------------|
| BCL11A_+58          | CTAACAGTTGCTTTTATCAC |
| ZNF410_sgRNA#1      | GAACCACCAGATGTTTTCGG |
| ZNF410_sgRNA#2      | CTCATCAGTGCCAAGTCTGT |
| Non-targeting_sgRNA | GACCGGAACGATCTCGCGTA |

**Table S3. Plasmids used in this study**

| Plasmids                                | Vector    | Tags   |
|-----------------------------------------|-----------|--------|
| pSDM-HA-ZNF410                          | pSDM101   | N-HA   |
| pSDM-HA-CHD4                            | pSDM101   | N-HA   |
| pSDM-HA-ZF(1-5)                         | pSDM101   | N-HA   |
| pSDM-HA-ZF(2-4)                         | pSDM101   | N-HA   |
| pcDNA3-FLAG ZNF410 full-length 1-478 aa | pcDNA3    | N-FLAG |
| pcDNA3-FLAG ZNF410 ZF (1-5) 209-366 aa  | pcDNA3    | N-FLAG |
| pcDNA3-FLAG ZNF410 ZF (1-4) 209-338 aa  | pcDNA3    | N-FLAG |
| pcDNA3-FLAG ZNF410 ZF (2-5) 244-366 aa  | pcDNA3    | N-FLAG |
| pcDNA3-FLAG ZNF410 ZF (1-3) 209-308 aa  | pcDNA3    | N-FLAG |
| pcDNA3-FLAG ZNF410 ZF (2-4) 244-338 aa  | pcDNA3    | N-FLAG |
| pcDNA3-FLAG ZNF410 ZF (3-5) 274-366 aa  | pcDNA3    | N-FLAG |
| pGEX-6P-ZF (1-5)                        | pGEX-6P-1 | N-GST  |

**Table S4. Antibodies used in flow cytometry**

| Antibody                         | Clone | Source                   | Catalog# |
|----------------------------------|-------|--------------------------|----------|
| PE Anti-Human CD49d              | 9F10  | BioLegend                | 304304   |
| PE/Cy7 Anti-Human CD71           | CY1G4 | BioLegend                | 334112   |
| APC Anti-Human Band3             |       | New York Blood Center    |          |
| Anti-Fetal Hemoglobin-APC, human | HBF-1 | Thermo Fisher Scientific | MHFH05   |
| V450 Mouse Anti-Human CD45       | HI30  | BD Biosciences           | 560367   |
| FITC Anti-Human CD235a           | HI264 | BioLegend                | 349104   |
| PE Anti-Human CD33               | P67.6 | BioLegend                | 366608   |
| APC Anti-Human CD19              | HIB19 | BioLegend                | 302212   |

**Table S5. Primers for NGS sequencing**

| Name           |   | Sequence 5'-3'                 |
|----------------|---|--------------------------------|
| ZNF410 sgRNA#1 | F | GCCTCATATCCCATAATATTCAGCCCCAT  |
|                | R | GAGCCAGGCATCCCATAATATTCATATTCT |
| ZNF410 sgRNA#2 | F | ACACACGACATCCCATAATATCTTCTGGAG |
|                | R | GCCTCACCAACCCATAATATTCGCCAGTCT |

**Table S6. EMSA probe sequences**

| Probe name      | Probe sequence                          |
|-----------------|-----------------------------------------|
| WT CHD4 probe 1 | GCCTCA <b>TATCCATAATA</b> TTCAGCCCCAT   |
| WT CHD4 probe 2 | GAGCCAGG <b>CATCCATAATA</b> TTCATATTCT  |
| WT CHD4 probe 3 | ACACACGA <b>CATCCATAATA</b> TCTTCTGGAG  |
| WT CHD4 probe 4 | GCCTCAC <b>CAACCCATAATA</b> TTCCCCAGTCT |

Motifs are highlighted in “red”

**Table S7. Primers for ChIP-qPCR**

| Name            | Sequence 5'-3'        |
|-----------------|-----------------------|
| CHD4 promoter_F | GCAGACCTTTTGCAACTAACC |
| CHD4 promoter_R | GGGGTGCTTATTATGGGATG  |
| CHD4 enhancer_F | AGCAGCCATCCCATAATAGC  |
| CHD4 enhancer_R | CTCCATTTCTCTCCAGCTC   |
| HBG2_F          | TCACACACACACAAACACACG |
| HBG2_R          | AGATGGGGGCAAAGTATGTC  |

**Table S8. Top20 differentially expressed transcripts from HUDEP-2 and primary CD34+ cells RNA-seq**

| HUDEP-2 cells                    |              | Primary CD34+ cells              |              |
|----------------------------------|--------------|----------------------------------|--------------|
| <b>Top10 upregulated genes</b>   | log2(Z#2/NT) | <b>Top10 upregulated genes</b>   | log2(Z#2/NT) |
| <b>HBG1/2</b>                    | 4.28         | HSPB1                            | 2.15         |
| AC104389.5                       | 4.01         | IFI27                            | 1.78         |
| RNU5B-1                          | 3.60         | <b>HBG1/2</b>                    | 1.75         |
| SNORD97                          | 2.29         | SELENOW                          | 1.67         |
| CKB                              | 2.24         | RN7SL471P                        | 1.60         |
| PRG2                             | 2.17         | PKN1                             | 1.43         |
| H1F0                             | 2.13         | AC104389.5                       | 1.43         |
| AK1                              | 1.83         | STUB1                            | 1.40         |
| RNU5E-1                          | 1.82         | PAFAH1B3                         | 1.40         |
| CD63                             | 1.75         | CDKN1A                           | 1.38         |
|                                  | log2(Z#1/NT) |                                  | log2(Z#1/NT) |
| <b>HBG1/2</b>                    | 4.26         | HSPB1                            | 2.01         |
| AC104389.5                       | 3.95         | SELENOW                          | 1.55         |
| CKB                              | 2.44         | <b>HBG1/2</b>                    | 1.47         |
| H1F0                             | 2.41         | STUB1                            | 1.46         |
| PRG2                             | 2.09         | RPS19BP1                         | 1.42         |
| AK1                              | 1.99         | PAFAH1B3                         | 1.35         |
| MIF                              | 1.92         | ISOC2                            | 1.34         |
| CD63                             | 1.90         | PKN1                             | 1.32         |
| TMSB10                           | 1.79         | COA4                             | 1.30         |
| ATF5                             | 1.65         | DYNLT1                           | 1.27         |
| <b>Top10 downregulated genes</b> | log2(Z#2/NT) | <b>Top10 downregulated genes</b> | log2(Z#2/NT) |
| FOS                              | -1.88        | AC130456.3                       | -2.03        |
| S100A10                          | -1.59        | CBX6                             | -2.01        |
| <b>AC092490.1</b>                | -1.50        | TMCC2                            | -1.69        |
| SLC2A3P1                         | -1.49        | <b>AC092490.1</b>                | -1.47        |
| SCARNA3                          | -1.30        | ACSL6                            | -1.47        |
| <b>CHD4</b>                      | -1.23        | KDM7A                            | -1.32        |
| SCARNA18                         | -1.20        | ZNF410                           | -1.24        |
| RNU6-11P                         | -1.11        | SMOX                             | -1.24        |
| TUBA1A                           | -1.07        | PRDX5                            | -1.09        |
| PLA2G6                           | -1.01        | <b>CHD4</b>                      | -1.08        |
|                                  | log2(Z#1/NT) |                                  | log2(Z#1/NT) |
| RF00019                          | -2.43        | TMCC2                            | -2.01        |

|                   |       |                   |       |
|-------------------|-------|-------------------|-------|
| S100A10           | -1.60 | ACSL6             | -1.67 |
| <b>AC092490.1</b> | -1.45 | CBX6              | -1.56 |
| FOS               | -1.32 | <b>AC092490.1</b> | -1.50 |
| TMCC2             | -1.18 | ZNF410            | -1.49 |
| GLIPR2            | -1.14 | SMOX              | -1.45 |
| TUBA1A            | -1.06 | PRDX5             | -1.00 |
| <b>CHD4</b>       | -0.99 | <b>CHD4</b>       | -0.93 |
| PPP4R1            | -0.95 | SPC25             | -0.93 |
| SCARNA3           | -0.89 | GPCPD1            | -0.93 |

**Table S9. Analysis of H3K27ac ChIP-seq and ATAC signal from primary human erythroid cells at ZNF410 motifs**

| Motif                         | # of motif in human genome | H3K27ac only | ATAC signal only | Both |
|-------------------------------|----------------------------|--------------|------------------|------|
| CATCCCATAATA                  | 434                        | 11           | 13               | 15   |
| <b>T</b> ATCCCATAATA          | 561                        | 17           | 9                | 3    |
| C <b>A</b> GCCCATAATA         | 529                        | 20           | 15               | 5    |
| CA <b>A</b> CCCATAATA         | 464                        | 13           | 9                | 2    |
| CATCCCATA <b>A</b> TT         | 484                        | 15           | 7                | 4    |
| C <b>A</b> GACCATAATA         | 351                        | 9            | 9                | 2    |
| CAT <b>A</b> CCATAATA         | 422                        | 11           | 6                | 2    |
| CATCCC <b>G</b> TAATA         | 33                         | 2            | 2                | 1    |
| CATCCCATA <b>A</b> T <b>G</b> | 399                        | 13           | 11               | 2    |

Distinct nucleotides are highlighted in “red”.

**Table S10. Summary of X-ray data collection and refinement statistics**

|                                                                 |                                        |
|-----------------------------------------------------------------|----------------------------------------|
| PDB ID code                                                     | 6WMI                                   |
| ZNF410                                                          | ZF1-5 (residues 217-366)               |
| DNA oligo (5'-3')<br>(3'-5')                                    | CACATCCCATAATAATG<br>GTGTAGGGTATTATTAC |
| X-ray Source (wavelength)                                       | SETCAT 22-ID (1.0Å)                    |
| Space group                                                     | $P6_2$                                 |
| Unit cell (Å)                                                   | 186.26, 186.26, 46.95                  |
| $\alpha, \beta, \gamma$ (°)                                     | 90, 90, 120                            |
| Resolution (Å)                                                  | 41.92-2.75 (2.85-2.75) *               |
| <sup>a</sup> $R_{\text{merge}}$                                 | 0.22 (0.50)                            |
| $R_{\text{pim}}$                                                | 0.07 (0.82)                            |
| CC <sub>1/2</sub> , CC                                          | 0.991, 0.998 (0.498, 0.815)            |
| <sup>b</sup> $\langle I/\sigma I \rangle$                       | 12.3 (1.3)                             |
| Completeness (%)                                                | 100 (100)                              |
| Redundancy                                                      | 11.1 (10.0)                            |
| Observed reflections                                            | 522,370                                |
| Unique reflections **                                           | 47,241 (4,697)                         |
| <b>Phase Determination</b>                                      |                                        |
| Bijvoet Pairs                                                   | 22,583                                 |
| Mean FOM (SAD)                                                  | 0.482 (5 Å), 0.276 (2.75 Å)            |
| Density modification R-Factor                                   | 0.34 (5 Å), 0.35 (2.75 Å)              |
| <b>Refinement</b>                                               |                                        |
| Resolution (Å)                                                  | 2.75                                   |
| No. reflections **                                              | 47,202                                 |
| <sup>c</sup> $R_{\text{work}}$ / <sup>d</sup> $R_{\text{free}}$ | 0.159 / 0.194                          |
| No. atoms: protein                                              | 1140                                   |
| DNA                                                             | 350                                    |
| Zn                                                              | 10                                     |
| Solvent                                                         | 137                                    |
| B-factor (Å <sup>2</sup> ): protein                             | 67.4                                   |
| DNA                                                             | 58.8                                   |
| Zn                                                              | 66.2                                   |
| Solvent                                                         | 45.5                                   |
| <b>R.m.s deviations</b>                                         |                                        |
| Bond Length(Å)                                                  | 0.005                                  |
| Bond angles (°)                                                 | 0.7                                    |

\* Values in parenthesis correspond to highest resolution shell. \*\* Friedel mates kept separately.

<sup>a</sup>  $R_{\text{merge}} = \sum |I - \langle I \rangle| / \sum I$ , where  $I$  is the observed intensity and  $\langle I \rangle$  is the averaged intensity from multiple observations.

<sup>b</sup>  $\langle I/\sigma I \rangle =$  averaged ratio of the intensity ( $I$ ) to the error of the intensity ( $\sigma I$ ).

<sup>c</sup>  $R_{\text{work}} = \sum |F_{\text{obs}} - F_{\text{cal}}| / \sum |F_{\text{obs}}|$ , where  $F_{\text{obs}}$  and  $F_{\text{cal}}$  are the observed and calculated structure factors.

<sup>d</sup>  $R_{\text{free}}$  was calculated using a randomly chosen subset (5%) of the reflections not used in refinement.
